1 **KIM-1-mediated anti-inflammatory activity is preserved by MUC1 induction in the proximal tubule**  
2 **during ischemia-reperfusion injury**

3  
4 Mohammad M. Al-bataineh<sup>1</sup>, Carol L. Kinlough<sup>1</sup>, Zaichuan Mi<sup>2</sup>, Edwin K. Jackson<sup>2</sup>, Stephanie M. Mutchler<sup>1</sup>,  
5 David R. Emlet<sup>3</sup>, John A. Kellum<sup>1,3</sup>, and Rebecca P. Hughey<sup>1</sup>.

6  
7 <sup>1</sup>Renal-Electrolyte Division, Department of Medicine, <sup>2</sup>Department of Pharmacology and Chemical Biology,  
8 <sup>3</sup>Center for Critical Care Nephrology, Department of Critical Care Medicine. University of Pittsburgh School  
9 of Medicine, Pittsburgh, PA.

10

11 **CORRESPONDENCE:**

12 Mohammad Al-bataineh, DVM, MS, PhD  
13 Assistant Professor of Medicine  
14 Renal-Electrolyte Division  
15 School of Medicine  
16 University of Pittsburgh  
17  
18 Scaife Hall S931  
19 3550 Terrace Street  
20 Pittsburgh, PA 15261  
21 phone: 412-648-9081  
22 email: [mma57@pitt.edu](mailto:mma57@pitt.edu)  
23

24 **RUNNING TITLE:** MUC1 protects KIM-1 activity

25

26 **Supplemental Material available at DOI:** <https://doi.org/10.6084/m9.figshare.14364890>

27

28 **ABSTRACT:**

29 Cell-associated kidney injury molecule-1 (KIM-1) exerts an anti-inflammatory role following kidney injury  
30 by mediating efferocytosis and downregulating the NF- $\kappa$ B pathway. KIM-1 cleavage blunts its anti-  
31 inflammatory activities. We reported that Mucin 1 (MUC1) is protective in a mouse model of ischemia-  
32 reperfusion injury (IRI). As both KIM-1 and MUC1 are induced in the proximal tubule (PT) during IRI and are  
33 ADAM17 substrates, we tested the hypothesis that MUC1 protects KIM-1 activity. *Muc1* KO mice and wild-  
34 type (WT) littermates were subjected to IRI. KIM-1, MUC1 and ADAM17 levels (and signaling pathways)

35 were assessed by immunoblotting. PT localization was assessed by confocal microscopy and *in situ*  
36 proximity ligation assay. Findings were extended using human kidneys and urine, and KIM-1-mediated  
37 efferocytosis assays in mouse PT cultures. In response to tubular injury in mouse and human kidneys, we  
38 observed induction and co-expression of KIM-1 and MUC1 in the PT. Compared to WT, *Muc1* KO mice  
39 had higher urinary KIM-1 and lower kidney KIM-1. KIM-1 was apical in PT of WT kidneys, but predominately  
40 with luminal debris in *Muc1* KO mice. Efferocytosis was reduced in *Muc1* KO PT cultures when compared  
41 to WT cells, while inflammation was increased in *Muc1* KO kidneys when compared to WT mice. MUC1  
42 was cleaved by ADAM17 in PT cultures, and blocked KIM-1 shedding in MDCK cells. We conclude that  
43 KIM-1-mediated efferocytosis and thus anti-inflammatory activity during IRI is preserved in the injured  
44 kidney by MUC1 inhibition of KIM-1 shedding.

45

#### 46 **NEW & NOTEWORTHY.**

47 KIM-1 plays a key role in the recovery of the tubule epithelium during renal IRI by mediating efferocytosis  
48 and associated signaling that suppresses inflammation. Excessive cleavage of KIM-1 by ADAM17 provides  
49 decoy receptor that aggravates efferocytosis and subsequent signaling. Our data from studies in mice,  
50 patients and cultured cells show that MUC1 is also induced during IRI and competes with KIM-1 for cleavage  
51 by ADAM17. Consequently, MUC1 protects KIM-1 anti-inflammatory activity in the damaged kidney.

52

#### 53 **INTRODUCTION**

54 Kidney injury molecule-1 (KIM-1) is a type I transmembrane glycoprotein that is rapidly induced at the gene  
55 and protein levels after acute kidney injury (AKI) (1, 2). Specifically, KIM-1 is upregulated on the apical  
56 surface of surviving proximal tubule (PT) epithelial cells of the kidney following ischemic and toxic acute  
57 kidney injury (AKI) (1-3). KIM-1 is also upregulated in chronic kidney disease, renal cell carcinoma, and  
58 polycystic kidney disease (4-6). Mechanistically, it was recently reported that the transcription factor signal  
59 transducer and activator of transcription 3 (STAT3) is phosphorylated by checkpoint kinase 1 (ChK1) and/or  
60 extracellular signal-regulated kinases 1 and 2 (ERK1/2) following kidney injury which leads to upregulation  
61 of KIM-1 expression (7, 8). Structurally, KIM-1 contains an extracellular Ig-like domain and mucin-like

62 domain, one transmembrane domain and a cytoplasmic domain with a tyrosine kinase phosphorylation  
63 motif (9). The ectodomain of human and mouse KIM-1 is cleaved by a disintegrin and metalloproteinase  
64 domain 17 (ADAM17) generating soluble KIM-1 (cleaved form), and thereby constitutively shed into the  
65 urine providing an early and sensitive biomarker for kidney injury (10, 11). There are also reports that  
66 cleavage by ADAM10 may contribute to shedding of mouse and human KIM-1 (12).

67

68 Cell-associated KIM-1 exhibits an anti-inflammatory function and thus plays a protective role after kidney  
69 injury by (i) downregulating the proinflammatory NF- $\kappa$ B signaling pathway in a phosphoinositide 3-kinase  
70 (PI3K)-dependent manner, and by (ii) acting as a receptor for phosphatidylserine (an “eat me” signal  
71 presented by apoptotic cells) (1, 2). The cell-associated form of KIM-1 enables PT epithelial cells to  
72 recognize and mediate phagocytosis of apoptotic and necrotic cells (efferocytosis) following kidney injury,  
73 which in turn prevents inflammation and promotes kidney repair (1, 2). However, accelerated shedding of  
74 KIM-1 that is mediated by ADAM17 and regulated by p38 mitogen-activated protein kinase (p38 MAPK) in  
75 a cell culture model, competitively inhibits efferocytosis, as the excess soluble KIM-1 acts as a decoy to the  
76 cell-associated KIM-1 (10, 13).

77

78 The involvement of ADAM17 in a variety of processes reflects the wide range of ADAM17 substrates  
79 including the pro-inflammatory cytokine TNF- $\alpha$ , epidermal growth factor receptor (EGFR) ligand, KIM-1, and  
80 MUC1 (10, 14). Despite the substantial clinical impact of KIM-1 cleavage by ADAM17 during AKI, there is no  
81 *in vivo* data about the regulation of KIM-1 shedding following AKI. It is known that ADAM17 is weakly  
82 expressed by normal kidney, while its expression is significantly upregulated in PT, capillaries, and glomeruli  
83 after AKI (15, 16). But, with more than 80 different reported ADAM17 substrates, it is clear that targeting or  
84 blocking cleavage of KIM-1 would involve a cell-specific event.

85

86 There is emerging evidence that the transmembrane glycoprotein Mucin 1 (MUC1), expressed on the apical  
87 surface of polarized epithelial cells in kidney, plays novel and important roles under physiological and  
88 pathological conditions (17). We previously reported that MUC1 plays a protective role in a mouse model of

89 ischemia-reperfusion injury (IRI) by stabilizing HIF-1 $\alpha$  and  $\beta$ -catenin levels and downstream signaling (18,  
90 19). Although MUC1 is normally expressed in the thick ascending limb and distal nephron, we discovered  
91 that MUC1 is present at low levels in the PT and significantly induced after ischemic injury (17, 19). There  
92 are also reports that the MUC1 ectodomain is shed in response to a specific cleavage by ADAM17 but not  
93 ADAM10 (14, 20).

94

95 As both KIM-1 and MUC1 are protective during IRI, while both are induced in the PT, we were intrigued in  
96 preliminary studies to find increased KIM-1 during IRI in the urine of *Muc1* KO mice when compared to WT  
97 littermates. We initially expected to find increased KIM-1 expression in response to increased injury in the  
98 absence of MUC1, but instead we found reduced KIM-1 levels in the kidney. As activation of upstream  
99 pathways regulating KIM-1 expression was no different in *Muc1* KO and WT mice, we also assessed p38  
100 MAPK regulation of ADAM17 expression but found no differences. However, when we compared data from  
101 mouse kidneys and urine during IRI, and cell culture models of KIM-1 and MUC1 shedding, we established  
102 that MUC1 stabilizes KIM-1 and its activity in the PT by direct competition as a substrate for cleavage by  
103 ADAM17. This study provides new insights into our understanding of the mechanism of KIM-1 shedding *in*  
104 *vivo* that has a significant clinical impact on kidney recovery following injury. It also provides a novel aspect  
105 of MUC1 protection of the kidney during IRI by preserving KIM-1 function.

106

## 107 **MATERIALS AND METHODS**

### 108 **Cells and Reagents**

109 Madin-Darby Canine Kidney (MDCK 2001) cells were obtained from Kai Simons in the European Molecular  
110 Biology Laboratory (EMBL) in Heidelberg, Germany. These cells were grown in DMEM/F12 (D6421)  
111 supplemented with 5% FBS (GIBCO/ThermoFisher, Grand Island, NY) and maintained at 37°C in 5% CO<sub>2</sub>.  
112 All chemical compounds used in the studies presented here were purchased from Sigma-Aldrich (St. Louis,  
113 MO, USA) unless otherwise stated. The sources and other information of primary antibodies are detailed  
114 in supplementary **Table 1** (DOI: <https://doi.org/10.6084/m9.figshare.14364890>). FITC- or Rhodamine-  
115 labeled antibodies and TO-PRO Cy5 were obtained from Molecular Probes (ThermoFisher, Grand Island,

116 NY). Secondary horseradish peroxidase (HRP)-conjugated anti-rabbit immunoglobulin G (IgG) and anti-  
117 mouse IgG antibodies were obtained from SeraCare (Milford, MA, USA). HRP-conjugated anti- $\beta$ -actin  
118 antibodies were obtained from Proteintech (Rosemont, IL, USA).

119

## 120 **Preparation of Primary Cultures of Proximal Tubule Cells (PTCs)**

121 Primary cultures of mouse kidney PTCs from *Muc1* KO, WT littermates, and transgenic mice expressing  
122 human MUC1 were generated as previously described (1, 21, 22). Briefly, the kidney cortex was dissected  
123 and minced into pieces (~1 mm) in prewarmed Hank's Balanced Salt Solution (HBSS; Life Technologies,  
124 Grand Island, NY). Tissues were then gently washed to remove debris and digested in HBSS containing  
125 1 mg/ml collagenase type II (Sigma-Aldrich, St. Louis, MO). Tissue dissociation was performed for 60 min  
126 in a shaker (200 rpm) at 37°C with intermittent mixing (vortex for 30 sec). The collagenase reaction was  
127 terminated using 5% BSA, and cell preparations were then washed and passed through a cell strainer  
128 (nylon mesh) with 40- $\mu$ m pores to remove undigested material and glomeruli. Finally, cells were washed  
129 twice and resuspended in collagen I-coated glass coverslips or 12-well plates in a medium composed of  
130 equal volumes of DMEM and Ham's F-12 plus 60 nM sodium selenate, 5 mg/ml transferrin, 2 mM  
131 glutamine, 50 nM dexamethasone, 1 nM triiodothyronine, 10 ng/ml epidermal growth factor, 5 mg/ml  
132 insulin, 20 mM D-glucose, 2% (vol/vol) FBS, 20 mM HEPES, and antibiotics, pH 7.4 (reagents from Life  
133 Technologies and Sigma-Aldrich). The epithelial cells were used in experiments between 6 and 7 days of  
134 culture without passaging. All solute concentrations are wt/vol unless noted otherwise.

135

## 136 **Animals and IRI Protocol**

137 All studies were conducted in accordance with the National Institutes of Health Guide for the Care and Use  
138 of Laboratory Animals and approved by the University of Pittsburgh School of Medicine Animal Care and  
139 Use Committee. All experiments were conducted using 12-16-week-old male and female C57BL/6J mice.  
140 *Muc1* global KO mice on a C57BL/6J background were as previously described and have no obvious  
141 phenotype under normal physiological conditions other than increased sensitivity to bacterial infections  
142 (23, 24). Acute kidney injury (AKI) was induced as previously described using the two-kidney hanging-

143 weight model of renal ischemia-reperfusion injury (IRI) (25). Briefly, each mouse was anesthetized with  
144 isoflurane (5% for induction and 1%–2% for maintenance) in oxygen and placed in the supine position on  
145 a thermostatically controlled heating system connected to a rectal temperature sensor to maintain body  
146 temperature at 37°C. Ischemia was induced by passing a 4/0 silk suture between the renal artery and vein  
147 of a kidney and the ends of the suture were passed over a pulley system. Next, the ends were attached to  
148 1-gram weights and the weights are allowed to hang, thus compressing the renal artery with the suture.  
149 After 20 minutes of ischemia, the suture was removed, and the procedure was repeated on the opposite  
150 kidney followed by reperfusion for 48 hr. Sham mice were treated exactly like injured mice except that the  
151 weights were not attached to the ends of the suture.

152

153 After 48 h recovery, mean arterial blood pressure (MABP) and heart rate (HR) were measured after  
154 inserting a PE-10 catheter into the carotid artery of anesthetized mouse and connected to a digital blood  
155 pressure analyzer (Micro-Med, Inc., Louisville, KY). Renal blood flow (RBF) was measured by placing a  
156 transit-time flow probe (0.5SB with J-reflector and no handle; custom-designed by Transonic Systems,  
157 Inc.; Ithaca, NY) on either the right or left renal artery of the anesthetized mouse and connected to a model  
158 T402-PP Transonic flowmeter.

159

160 Glomerular filtration rate (GFR) was estimated as described previously (Ref. #25). Briefly, a constant rate  
161 infusion (10  $\mu$ l/min) of  $^{14}$ C-inulin (0.0035  $\mu$ Ci/min dissolved in 0.9% saline containing 2.45% albumin) was  
162 initiated through the femoral vein catheter. While for collection of urine, a short segment of PE-50 tubing  
163 was inserted into silastic tubing, a small hole was made in the rostral end of the bladder using a cautery,  
164 and the silastic-covered PE-50 tubing was inserted into the bladder. After completion of surgery, a one-  
165 hour rest period was allowed to permit the mouse to stabilize and to let plasma  $^{14}$ C-inulin levels approach  
166 steady state. At the end of the one-hour rest period, urine was collected for one hour, and the mouse is  
167 carefully moved to the prone position.  $^{14}$ C-inulin was determined in urine and plasma by measuring  
168 radioactivity in these samples, and GFR was estimated by calculating the renal clearance of  $^{14}$ C-inulin.

169 KIM-1 was also measured in urine as a marker for PT injury using a mouse ELISA kit (Abcam, Cambridge,  
170 MA; ab119596). As a marker of distal nephron injury, neutrophil gelatinase-associated lipocalin (NGAL)  
171 was also measured in urine with a mouse ELISA kit (Abcam; ab119601). At the end of the experiment, a  
172 blood sample was collected in heparin from the carotid artery catheter, and Serum creatinine (sCr) was  
173 measured at the University of Texas Southwestern Medical Center using a Capillary Electrophoresis  
174 method (26).

175

### 176 **Kidney Tissue Preparation and Confocal Immunofluorescence Microscopy**

177 One kidney from each mouse was sliced lengthwise and placed in 4% DEPC-treated paraformaldehyde,  
178 methacarn (chloroform/methanol/acetic acid) for histology or was snap frozen in liquid nitrogen and then  
179 stored at -80°C for subsequent preparation of homogenates for further analysis (e.g. immunoblotting).  
180 Subsets of kidneys in 4% paraformaldehyde were sent to the University of Pittsburgh's pathology  
181 laboratory (the P30 O'Brien Core) for preparation of paraffin blocks and for production of kidney slides.  
182 Immunofluorescence labeling was subsequently performed, after removing paraffin and antigen retrieval,  
183 using antibodies against mouse KIM-1 raised in goat (1:200 dilution), followed by a secondary donkey anti-  
184 goat antibody coupled to Alexa 488 (1:400 dilution). Tissues were also co-labeled with an antibody raised  
185 in rabbit against the organic anion transporter 1 (OAT1) localized on the PT basolateral surface (1:400  
186 dilution) followed by a secondary antibody raised in donkey coupled to CY3 (1:800 dilution). Mouse kidney  
187 tissues were also labeled with a monoclonal antibody raised in Armenian hamster against MUC1  
188 cytoplasmic tail (CT2, 1:200 dilution), followed by a secondary goat anti-Armenian hamster antibody  
189 coupled to Alexa 488 (1:400 dilution). Immunolabeled tissues were mounted in *VECTASHIELD*<sup>®</sup> mounting  
190 medium (Vector Laboratories) and imaged in a confocal laser scanning microscope (Leica TCS SP5,  
191 Model upright DM 6000S, Leica Microsystems Inc., Buffalo Grove, IL, USA) using a 63x objective with  
192 identical laser settings for all samples.

193

### 194 **Immunoblotting**

195 These experiments were performed according to published methods (19, 27) and adapted as follows. The  
196 snap-frozen kidney quarter (~0.4 mg) was homogenized in ice-cold lysis buffer (All solute concentrations  
197 are wt/vol unless noted otherwise): 150 mM NaCl, 10 mM Tris (pH 7.4), 1% Triton X-100, 0.5% Igepal, 1  
198 mM EDTA, 1 mM ethylene glycol-bis( $\beta$ -aminoethyl ether)-N,N,N',N'-tetraacetic acid (EGTA), and both  
199 protease and phosphatase inhibitor cocktails (EMD Millipore, Burlington, MA, USA). The protein samples  
200 were then separated by SDS-PAGE on a 4–12% gradient gel (Nu-PAGE, Invitrogen), followed by transfer  
201 to nitrocellulose membranes (0.45  $\mu$ m, Millipore). Then, the blots were probed with anti-MUC1 CT2  
202 antibody (1:1000 dilution), antibodies raised in rabbit against: ADAM17 (1:1000 dilution), p-STAT3 (1:1000  
203 dilution), ERK1/2 (1:5000 dilution), p-ERK1/2 (1:5000 dilution); p38 MAPK (1:5000 dilution), p-p38 MAPK  
204 (1:5000 dilution), NF $\kappa$ B p65 (1:5000 dilution), and TLR-4 (1:5000 dilution), or antibodies raised in goat  
205 against the mouse TIM-1/KIM-1/HAVCR (1:1000 dilution), or mouse antibody against the STAT3 (1:1000  
206 dilution), or anti- $\beta$ -actin antibody raised in mouse (1:20,000 dilution) to confirm equal loading of protein.  
207 Each probed protein was then visualized and quantified using Bio-Rad Clarity ECL, a Bio-Rad ChemiDoc  
208 Imager and Bio-Rad Quantity One or Image Lab software. Blots of samples from *Muc1* KO and WT mouse  
209 kidneys were developed side-by-side for the same time period.

210

211 Isolation of nuclear and cytoplasmic fractions of soluble proteins from a quarter of a kidney was performed  
212 using the NE-PER Nuclear and Cytoplasmic Extraction Kit as per manufacturer's instructions  
213 (ThermoFisher Scientific, Waltham, MA, USA). Aliquots of the nuclear and cytoplasmic fractions were  
214 subjected to immunoblotting for NF $\kappa$ B p65 (1:5000 dilution), and  $\beta$ -actin (cytoplasmic fraction) or Histone  
215 H3 (nuclear fraction). Blots of samples from *Muc1* KO and wild-type mouse kidneys were developed side-  
216 by-side for the same time.

217

### 218 **Quantitative, real-time, reverse-transcriptase polymerase chain reaction**

219 Whole kidney mRNA was isolated using Trizol. One microgram of total RNA was added to a cDNA  
220 synthesis kit (BioRad) and cDNA was added to reactions containing SYBR green master mix and a pairing  
221 of the following primers: KIM1<sup>[RT1]</sup> forward 5'-TTC AGG AAG CTG AGC AAA CAT-3', KIM1 reverse 5'-



222 CCCCAACATGTCGTTGTGATT-3', 18s forward 5'-GTAACCCGTTGAACCCCATT-3', 18S reverse 5'-  
223 CCATCCAATCGGTAGTAGCG-3'. Differences in expression were calculated using the  $2^{-\Delta\Delta Ct}$  method.

224

### 225 **Human Kidneys with Ischemic Damage and Urine Samples**

226 Whole adult human kidneys were obtained from the Center for Organ Recovery and Education (CORE,  
227 Pittsburgh, PA) through protocol #462 approved by the University of Pittsburgh Committee for Oversight  
228 of Research and Clinical Training Involving Decedents. Kidney samples were from donation-after-cardiac-  
229 death or brain-dead donors that were not accepted for transplant. Therefore, we anticipated that these  
230 kidneys exhibit some degree of ischemic damage, allowing the opportunity to study the expression of KIM-  
231 1, the most highly upregulated protein in the PT after kidney injury. Supplementary **Table 3** (DOI:  
232 <https://doi.org/10.6084/m9.figshare.14364890>) lists the wedge biopsy reports of the samples used in this  
233 study. All reports list some degree of inflammation, tubular injury, or fibrosis (albeit mild) and further  
234 supports our anticipation that these kidneys underwent some sort of stress conditions that would induce  
235 KIM-1 expression. Kidneys were then processed as previously described (21). For human kidney, tissues  
236 were processed and 5  $\mu\text{m}$ -thick cryosections were prepared as described above. Immunofluorescence  
237 labeling was performed using the mouse monoclonal antibody B27.29 against human MUC1 tandem  
238 repeat (1:1000 dilution) with goat antibodies against human KIM-1 (1:200 dilution), followed by a secondary  
239 donkey anti-mouse antibody coupled to CY3 (1:800 dilution), and donkey anti-goat antibody coupled to  
240 Alexa 488 (1:400 dilution), respectively. The B27.29 epitope maps to two separate parts of the tandem  
241 repeats including the PDTRP peptide and the glycosylated Thr\* and Ser\* (GVT\*S\*APDTRPAPG) and  
242 therefore affinity can be affected by glycosylation. As human MUC1 has 40-100 tandem repeats this  
243 antibody is much more sensitive for IF staining than the anti-cytoplasmic tail antibody CT2. Immunolabeled  
244 tissues were mounted and imaged as described above.

245

### 246 ***In Situ* Proximity Ligation Assay**

247 Proximity ligation assay (PLA) was performed according to the manufacturer's instructions (Duolink In Situ  
248 detection reagent-Red, Sigma Aldrich). Briefly, kidney tissues were permeabilized with 0.5% Triton X-100

249 in PBS (pH 7.4) and incubated overnight with the mouse monoclonal antibody B27.29 against MUC1  
250 extracellular domain tandem repeat (1:1000 dilution), and with rabbit antibodies against ADAM17 (1:100  
251 dilution). Next day, donkey anti-mouse PLA<sup>minus</sup>, and donkey anti-rabbit PLA<sup>plus</sup> probes were applied,  
252 followed by ligation and amplification with Duolink detection reagent Texas Red according to the  
253 manufacturer's instructions (Duolink In Situ detection reagent-Red, Sigma Aldrich). The samples were then  
254 imaged in a confocal laser scanning microscope (Leica TCS SP5, Model upright DM 6000S, Leica  
255 Microsystems Inc., Buffalo Grove, IL, USA) using a 20x objective with identical laser settings for all  
256 samples. All PLA assays were performed in two independent experiments with a negative control where  
257 only ADAM17 antibody was added.

258

### 259 ***In Vitro* Cell Culture Model of KIM-1 Shedding**

260 MDCK cells were transfected with pcDNA 3.1(-) neo mKIM-1 encoding a cDNA for mouse KIM-1, and a  
261 stable mixed population of MDCK-KIM-1 cells was obtained by growth in G418. MDCK-KIM-1 cells plated  
262 in a 12-well dish were transiently transfected the next day with human *MUC1* cDNA (pcDNA3.1 *MUC1*) or  
263 empty vector (EV). The next day, cells were incubated for 2 h in serum free media with either 1.6  $\mu$ M  
264 phorbol-12-myristate-13-acetate in DMSO (PMA; induces ADAM17 metalloprotease-mediated shedding  
265 of KIM-1 and MUC1), 10 mM BB-94 in DMSO (Batimastat (Abcam, Cambridge, MA), a broad-  
266 spectrum matrix metalloprotease inhibitor), both PMA and BB-94, or vehicle (DMSO). Media was collected  
267 on ice and then centrifuged for 5 min at 2000 x g. The supernatant was moved to a clean tube and  
268 incubated overnight with 0.5  $\mu$ g of either goat anti-mouse KIM-1 or mouse anti-MUC1 (B27.29) antibodies  
269 and Protein G conjugated to Sepharose 4B (ThermoFisher). Beads were washed with 0.5 ml HEPES-  
270 buffered saline (HBS, 10 mM HEPES-HCl, pH 7.4, 150 mM NaCl) with 1% Triton X-100 and then 0.5 ml  
271 HBS before heating in Bio-Rad sample buffer with  $\beta$ -mercaptoethanol. Cells were washed twice with ice-  
272 cold Dulbecco's phosphate buffered saline (Corning Cellgro, Manassas, VA) before extraction with 0.2 ml  
273 detergent solution (100 mM NaCl, 40 mM KCl, 1 mM EDTA, 20 mM HEPES-KCl, pH 7.4, 10% glycerol,  
274 1% NP40, 0.4% deoxycholate) containing protease inhibitors (EMD Millipore, Burlington, MA, USA). Cell  
275 extract (2.5%) or immunoprecipitates of KIM-1 or MUC1 from media were immunoblotted for KIM-1 or

276 MUC1 using SDS-PAGE on a Bio-Rad TGX 4-15% acrylamide gradient gel and transfer to nitrocellulose  
277 (0.45  $\mu\text{m}$ , Millipore). Blots were developed with Bio-Rad Clarity Max Western ECL Substrate and imaged  
278 with a Bio-Rad Chemidoc and Bio-Rad Image Lab software.

279

### 280 ***In Vitro* Primary Cell Culture Model of MUC1 Shedding**

281 Primary cultures of proximal tubule cells from transgenic mice expressing human MUC1 (n=3) were grown  
282 for one week on plastic, then treated with either 3.0  $\mu\text{M}$  PMA or vehicle (DMSO) in serum free media for 1  
283 h in the presence or absence of protease inhibitors against both ADAM10 and ADAM17 (GW280264; 1.0  
284  $\mu\text{M}$ ) or specific for ADAM10 (GI254023; 0.5  $\mu\text{M}$ ) (28). Inhibitor concentrations were based on the published  
285  $\text{IC}_{50}$  values for GW280264 and GI254023 with ADAM17 and ADAM10 (28). Others have reported mouse  
286 KIM-1 shedding from HEK293 cells based on inhibition by GI254023 (4  $\mu\text{M}$ ) (29) although the  $\text{IC}_{50}$  for  
287 ADAM10 is 5 nM (28). Cell extract or media were immunoblotted for MUC1 as described above. Transgenic  
288 mice expressing human MUC1 were used because no antibodies exist to study mouse extracellular  
289 domain shedding. The only available antibody for mouse MUC1 is the Armenian hamster CT2 antibody  
290 that recognizes the MUC1 cytoplasmic tail.

291

### 292 **Preparation of Apoptotic Cells.**

293 Apoptotic thymocytes were prepared as previously described (1, 10, 30). Briefly, primary mouse  
294 thymocytes were disrupted into a single-cell suspension by passing through a 40- $\mu\text{m}$  cell strainer. Next  
295 day, thymocytes were labeled with carboxyfluorescein succinimidyl ester (CFSE; CellTrace CFSE dye,  
296 Invitrogen, Eugene, OR, USA) according to manufacturer's instructions and exposed to UV radiation (254  
297 nm) for one minute to induce apoptosis before incubation overnight at 37°C in 5%  $\text{CO}_2$ . Using annexin  
298 V/Dead Cell Apoptosis Kit (Alexa Fluor 488 annexin V/Dead Cell Apoptosis Kit with Alexa Fluor 488  
299 annexin V and propidium iodide, Invitrogen, Eugene, OR, USA), we observed more than 90% of exposed  
300 cells were deemed to be early apoptotic cells as evidence of Annexin V staining (binds to  
301 phosphatidylserine; PS: an "eat me" signal), whereas less than 5% of those were positive for the uptake  
302 of propidium iodide.

### 303 **Phagocytosis Assay.**

304 To quantitate phagocytosis of apoptotic cells, we used a previously established method (1, 10, 30). Briefly,  
305 primary cultures of mouse kidney PTCs obtained from *Muc1* KO and WT littermates were grown on glass  
306 coverslips or 12-well plate and then incubated with  $2 \times 10^6$  CFSE fluorescently labeled (FITC) apoptotic  
307 thymocytes for one hour at 37°C. After washing vigorously five times with ice-cold PBS (without  $Mg^{+2}/Ca^{+2}$ )  
308 to remove non-ingested apoptotic cells, PTC monolayers on glass coverslips were fixed, premetallized,  
309 and co-stained as described above. To quantify phagocytic uptake of apoptotic cells (efferocytosis), total  
310 number of internalized apoptotic cells per total number of epithelial cells were scored by blinded  
311 microscopic counting of random fields (five images per mouse; n = 4 mice). PTC monolayers grown on 12-  
312 well plate were solubilized using a lysis buffer containing 62.5 mM EDTA pH 8.0, 50 mM Tris pH 8.0, 4 mg  
313 sodium deoxycholate, and 1% NP-40 (IGEPAL). Fluorescence of the lysates was then analyzed using a  
314 multi detection plate reader (Promega Glomax Multi Detection System, Madison, WI). PTC monolayers  
315 not incubated with thymocytes were considered as a reference control.

316

### 317 **Statistical Analyses**

318 All analyses were performed using GraphPad Prism version 9.0.0 (GraphPad Software, San Diego,  
319 California USA). Comparisons involving only two groups were conducted with unpaired *t*-test, while  
320 multiple groups were analyzed using two-way ANOVA with a Tukey post hoc test.  $P < 0.05$  was considered  
321 significant and presented with an asterisk(s). All data are reported as mean values  $\pm$ SE.

322

## 323 **RESULTS**

### 324 **MUC1 Protection of Kidney Function During IRI is Associated with a Role in the Proximal Tubule.**

325 *Muc1* KO mice and wild-type (WT) littermates were subject to 20 min ischemia and 48 h recovery using the  
326 kidney hanging-weight protocol, or sham surgery. While heart rate, mean arterial blood pressure and renal  
327 blood flow were not different in *Muc1* KO mice and WT littermates after IRI or sham surgery (Fig. S1A-C;  
328 DOI: <https://doi.org/10.6084/m9.figshare.14364890>), we did find a significant reduction in the glomerular  
329 filtration rate (GFR) in the *Muc1* KO mice after IRI when compared to *Muc1* KO sham mice (Fig. 1A). We

330 also found a significant increase in serum creatinine in the *Muc1* KO mice after IRI when compared to  
331 *Muc1* KO sham mice or WT mice after IRI or sham surgery (Fig. 1B). Moreover, we found that the proximal  
332 tubule (PT) marker of kidney injury, KIM-1, but not the distal tubule injury marker of kidney injury, NGAL,  
333 was increased in the urine of *Muc1* KO mice after IRI when compared to *Muc1* KO mice sham and WT  
334 mice after IRI (Fig. 1C-D). Altogether, these data indicate that MUC1 protection during IRI is not related to  
335 changes in kidney hemodynamics, but reflects a role in the renal epithelial cells of the proximal tubules  
336 where MUC1 induction was previously observed (17, 18).

337

338 Using our established confocal immunofluorescence (IF) microscopy protocols (27, 31), we observed a  
339 strong induction and co-localization of KIM-1 and MUC1 in the same PT of WT mouse kidneys subjected  
340 to IRI (Fig. 2A). Similar results were observed by co-staining sections from human kidneys with ischemic  
341 damage (Fig. 2C & S2). Indeed, we observed induction of both KIM-1 and MUC1 in the same PT mainly  
342 at the apical membrane with substantial co-localization.

343

#### 344 **Kidney KIM-1 Levels are Significantly Lower in *Muc1* KO Mice than WT Mice after IRI.**

345 The increased urinary KIM-1 observed in the absence of MUC1 during IRI could reflect an increase in KIM-  
346 1 expression in the PT in response to more severe injury. Surprisingly, immunoblotting kidney extracts  
347 after IRI revealed a significant two-fold lower level of KIM-1 in *Muc1* KO mice when compared to WT mice  
348 (Fig. 3A) while MUC1 levels increased 40% during IRI (Fig. 3B). Interestingly, we found a significant  
349 upregulation of the levels of kidney KIM-1 mRNA in both *Muc1* KO and WT littermates following IRI when  
350 compared to sham surgery, yet we did not observe a significant difference based on genotype (Fig. 3C).  
351 We considered several mechanisms for this observation: (i) MUC1 could sequester ADAM17 from KIM-1  
352 after injury but we did not observe a difference in ADAM17 subcellular localization in *Muc1* KO mouse  
353 kidney compared to WT littermate kidneys after injury, as we noticed co-localization between KIM-1 and  
354 ADAM17 in both WT and *Muc1* KO mouse kidneys (Fig. 2B). (ii) MUC1 could stimulate the ERK1/2 →  
355 STAT3 → KIM-1 pathway reported to increase KIM-1 during IRI, but we found no changes in  
356 activation/phosphorylation of ERK1/2 and STAT3 by immunoblotting suggesting posttranslational effects

357 of MUC1 on KIM-1 expression (Fig. S3A-B; DOI: <https://doi.org/10.6084/m9.figshare.14364890>). (iii)  
358 Zhang et al. previously reported that ADAM17-mediated cleavage of KIM-1 is accelerated by p38 MAP  
359 kinase activation (11), but we found no difference in the levels of active phosphorylated p38 MAPK nor  
360 ADAM17 by immunoblotting kidney extracts from WT or *Muc1* KO mice during IRI (Fig. S4A-B; DOI:  
361 <https://doi.org/10.6084/m9.figshare.14364890>). Our results indicate that the pathway of KIM-1 accelerated  
362 shedding was apparently activated in our mouse model of IRI, but this induction of ADAM17 activity was not  
363 affected by MUC1 levels.

364

### 365 **MUC1, ADAM17, and KIM-1 are in the Same Complex in Kidney in the Setting of Ischemia.**

366 Thathiah et al. previously demonstrated that MUC1 and ADAM17 are in the same protein complex in  
367 human uterine epithelial cells(14). To assess this interaction in kidney, we used both confocal IF  
368 microscopy and an *in situ* proximity ligation assay (PLA) (27) (32). First, we observed an induction and IF  
369 co-localization of both MUC1 and ADAM17 within the same PT of kidneys from WT mice subjected to IRI  
370 (Fig. 4A), and human kidneys with ischemic damage (Fig. 4B). Although we could not detect a signal for  
371 MUC1 in the glomeruli, we observed a strong staining for ADAM17 in the glomeruli (Fig. 4B, middle) which  
372 we used as one of our negative controls for the PLA. We also observed a robust PLA signal for MUC1 and  
373 ADAM17 in human kidney with ischemic injury that was completely absent in the negative control lacking the  
374 anti-MUC1 antibody and absent in the glomerulus that lacks MUC1 expression (Fig. 4C). As there is no PLA  
375 probe available for the Armenian hamster CT2 antibody that recognizes the mouse MUC1 we were not able  
376 to assess this interaction in mouse kidneys. Importantly, we also observed co-localization between KIM-1,  
377 MUC1 and ADAM17 within the same PT of human kidneys with ischemic damage (Fig. 4D). Altogether,  
378 these data further suggest that KIM-1, MUC1 and ADAM17 are in the same protein complex, and ADAM17  
379 likely mediates KIM-1 and MUC1 shedding in kidney.

380

### 381 **KIM-1 Shedding is Reduced by MUC1 Expression in a Cell Culture Model.**

382 Using primary cultures of PT cells prepared from transgenic mice expressing human MUC1, we did  
383 observe ADAM-17-dependent shedding of MUC1 as previously described in human uterine epithelial

384 cells(14) (Fig. S5; DOI: <https://doi.org/10.6084/m9.figshare.14364890>). To test the hypothesis that MUC1  
385 competes with KIM-1 as a substrate for ADAM17, we used an *in vitro* model of cultured Madin-Darby  
386 Canine Kidney (MDCK) cells stably transfected with mouse KIM-1 and transiently transfected with human  
387 *MUC1* cDNA or empty vector. The following day, cells were incubated in serum-free medium with either (i)  
388 PMA (an ADAM17 activator), (ii) BB-94 (a broad spectrum matrix metalloprotease inhibitor), (iii) both PMA  
389 and BB-94, or (iv) vehicle (DMSO). By immunoblotting cell extracts and immunoprecipitates from culture  
390 medium, we observed that KIM-1 shedding was significantly enhanced after treating cells with PMA and  
391 inhibited after BB-94 treatment (Fig. 5). Levels of KIM-1 shedding (~1% per h) were similar to a previous  
392 study in cultured cells (10). Using two-way ANOVA, we found that KIM-1 shedding was significantly  
393 reduced overall by MUC1 expression ( $p < 0.01$ ) (Fig. 5C). We conclude that MUC1 and KIM-1 compete as  
394 substrates for ADAM17.

395

#### 396 **Cell Association and Function of KIM-1 are Reduced after IRI in the Absence of MUC1.**

397 Using confocal IF, we observed KIM-1 staining in the WT mouse kidney PT localized primarily to the apical  
398 membrane (Fig. 6A), with a low level of KIM-1 staining surrounding cellular debris within the adjacent tubule  
399 lumen consistent with efficient efferocytosis (Fig. 6A; insert). In contrast, KIM-1 staining is more diffuse in  
400 *Muc1* KO mouse kidney PT following injury (Fig. 6B), and KIM-1 staining is primarily associated with cell  
401 debris in the lumen of the PT (Fig. 6B; insert). The data are consistent with enhanced shedding of KIM-1  
402 from the PT after IRI in the absence of MUC1.

403

404 As KIM-1-mediated efferocytosis is dependent on cell-associated KIM-1, we used previously established  
405 assays (1, 2, 30) to measure uptake of fluorescently labeled (FITC) apoptotic thymocytes by primary  
406 cultures of PT cells (Fig. 7). We observed a significant 22% reduction in thymocyte uptake by *Muc1* KO  
407 PTCs compared to WT PTCs by IF (Fig. 7A-B) ( $p < 0.003$ ). Using a plate reader, *Muc1* KO PTCs growing  
408 on plastic exhibited significantly less fluorescence (76%) (Fig. 7C); when compared to WT PTCs ( $p < 0.01$ ).  
409 And, immunoblotting cell extracts revealed lower levels of KIM-1 expression in *Muc1* KO (71%) when  
410 compared to WT PTCs (Fig. 7D-E). Thymocytes were also observed in KIM-1-expressing cells but not in

411 KIM-1-negative cells (Fig. 7F and 7G). Taken together, the decreased efferocytosis in *Muc1* KO PTCs  
412 could be explained, in part, by reduced surface expression of KIM-1 in the absence of MUC1.

413

414 Cell-associated KIM-1 exhibits an anti-inflammatory function by downregulating Toll-Like Receptor 4  
415 (TLR4) and its downstream signaling proinflammatory NF- $\kappa$ B pathway following injury (2). By  
416 immunoblotting kidney extracts we observed a significantly higher increase in TLR4, and NF- $\kappa$ B (nuclear  
417 and cytoplasmic), during IRI in *Muc1* KO mice than WT mice (Fig. 8A-C). Altogether, the data indicate that  
418 MUC1 stabilizes cell-associated KIM-1 during IRI which could protect the kidney by downregulating innate  
419 immunity and inflammation (Fig. 9).

420

## 421 **DISCUSSION**

422 Using a mouse model of ischemia-reperfusion injury (IRI) where the renal pedicles were clamped for 19  
423 min, we found that MUC1 predominately found in the TAL and later segments of the kidney tubule, was  
424 actually present and notably induced in the PT over 72 h recovery (17, 18). Kidney damage was worse,  
425 and recovery was blocked during IRI in *Muc1* KO mice when compared to congenic sham mice (based on  
426 histology and sCr), and we discovered that MUC1 stabilized both HIF-1 $\alpha$  and  $\beta$ -catenin, their protective  
427 signaling pathways, and prevented metabolic stress including prolonged activation of AMPK (18, 19). In  
428 the present study, we used the hanging-weight protocol for renal IRI that has been shown to be a more  
429 clinically realistic model of IRI that provides highly reproducible kidney injury with virtually no tissue trauma  
430 or blood vessel congestion by blocking only the renal artery without venous occlusion (33, 34). After 20  
431 min ischemia using this new protocol and 48 h recovery, we found that *Muc1* KO mice had more severe  
432 kidney injury than littermate WT mice, consistent with our previous work. We also found MUC1 induced in  
433 kidney extracts by immunoblotting, and MUC1 induced in all kidney tubules including the PT by confocal  
434 microscopy. While we were not surprised to find significantly higher levels of urinary KIM-1 in the *Muc1* KO  
435 mice when compared to WT mice due to the more severe kidney injury, we were surprised to find reduced  
436 levels of KIM-1 in the kidney extracts of the *Muc1* KO mice despite similar induction of mRNA levels in the



437 Muc1 KO and WT kidneys. Our subsequent analysis was therefore focused on understanding how the  
438 absence of MUC1 could affect KIM-1 expression and consequently its function.

439

440 Given that KIM-1 is the most highly upregulated protein in the PT and because of its anti-inflammatory  
441 function following kidney injury (1, 2), there has been great effort to identify the upstream regulators of  
442 KIM-1. While results of two recent studies agree that phosphorylation of STAT3 is key to KIM-1  
443 upregulation, two different kinases were implicated in rat (ChK1) and mouse (ERK1/2) studies (7, 8).  
444 However, we found no difference in STAT3 levels or activation between our sham and treated mice, and  
445 no difference between the *Muc1* KO and WT mice. While we could have missed any acute phase reactions  
446 by focusing on 48 h recovery (7, 8, 35), we also considered whether KIM-1 shedding was affected by the  
447 absence of MUC1.

448

449 We first asked whether MUC1 could increase KIM-1 shedding by regulating the expression of a relevant  
450 protease. ADAM17, also known as tumor necrosis factor (TNF- $\alpha$ ) converting enzyme (TACE), is responsible  
451 for the ectodomain shedding of many cell surface proteins including KIM-1 and MUC1, and generation of  
452 many diverse active soluble ligands involved in development, regeneration, and inflammation (10, 14, 36,  
453 37). In fact, Tang *et al.* found increased levels of active p38 MAPK and mature ADAM17 in a liver model of  
454 IRI (38), and Zhang *et al.* found that KIM-1 shedding was accelerated in a cell culture model by p38 MAPK  
455 activation (11). While we did find activation of p38 MAPK and increased ADAM17 in our mouse kidney model  
456 of IRI when compared to sham, we found no differences between *Muc1* KO and WT mice.

457

458 Alternatively, we asked whether MUC1 could compete with KIM-1 as a substrate for ADAM17. This possibility  
459 would be consistent with our observed increase in urinary levels observed in the absence of MUC1 during  
460 IRI in mice while kidney levels of KIM-1 were reduced. Using IF confocal microscopy of mouse and human  
461 kidneys, and an *in situ* proximity ligation assay in human kidneys, we first established that MUC1, KIM-1 and  
462 ADAM17 are co-localized at the apical plasma membrane of PTs. However, after ischemic injury, mouse  
463 KIM-1 is primarily associated with cellular debris in the tubule lumen in the absence of MUC1, suggesting

464 that MUC1 blocks shedding of KIM-1. We also found that mouse KIM-1 shedding is stimulated in cultured  
465 MDCK cells (canine) by PMA, consistent with induction of ADAM17; and shedding is consistently reduced  
466 by co-expression with MUC1 and/or treatment of MDCK cells with a broad-spectrum metalloprotease  
467 inhibitor. Human MUC1 shedding is also reduced in primary cultures of transgenic mouse PT cells by an  
468 inhibitor specific for ADAM17 and ADAM10, but not by an inhibitor specific for ADAM10 alone. The  
469 consistency of our data implicating MUC1 inhibition of KIM-1 shedding is particularly interesting as human,  
470 murine and canine ADAM17 have greater than 90% amino acid sequence identity, while the transmembrane  
471 subunit of human and murine MUC1 exhibit only 65% identity that could reflect differences between species.  
472 Data from the Carson lab previously identified a specific site for human ADAM17 cleavage of human MUC1  
473 at a position 58 residues from the transmembrane domain, but found no evidence of MUC1 cleavage by  
474 ADAMs 9, 10, 12 or 15 (14, 20). As recent studies have implicated ADAM10 in cleavage of human and  
475 mouse KIM-1 (12, 13), it becomes important to reassess the role of ADAM10 in mouse and human MUC1  
476 shedding in future studies.

477

478 More importantly, we observed a difference in KIM-1 functional activity between *Muc1* KO mice and WT mice  
479 in kidneys during IRI. Cell-associated KIM-1 has an anti-inflammatory role as it mediates phagocytic  
480 clearance of apoptotic and necrotic cells (efferocytosis) following kidney injury, which in turn prevents  
481 inflammation and promotes kidney repair (1, 30). Furthermore, efferocytosis mediated by cell-associated  
482 KIM-1 also triggers KIM-1 signaling and thus downregulation of the pro-inflammatory NF $\kappa$ B signaling  
483 pathway (2). However, any accelerated shedding of KIM-1 competitively inhibits efferocytosis and its  
484 subsequent anti-inflammatory effects, as the excess soluble KIM-1 also acts as a decoy to cell-associated  
485 KIM-1 (10). Using confocal microscopy, we observed that KIM-1 was primarily apical (cell-associated) in  
486 the PT of WT mice where it mediates phagocytosis by interacting directly and partly surrounding the  
487 adjacent cellular debris following injury. In contrast, KIM-1 staining is confined mainly to the tubular lumen  
488 (cleaved form) together with cell debris even in the surviving PT of *Muc1* KO mouse kidneys after injury.  
489 Furthermore, using IF-staining, we also observed KIM-1 localized at the phagocytic cup and surrounding  
490 phagocytosed apoptotic cells within PTCs. More importantly, we noticed a significant difference in KIM-1

491 functional activity (efferocytosis) between *Muc1* KO and WT primary cultured PTCs. Finally, we  
492 demonstrated internalization of apoptotic cells within KIM-1 expressing cells but not adjacent KIM-1-negative  
493 primary cells.

494

495 Our findings are in agreement with a previous report in which authors confirmed the internalization of  
496 apoptotic cells by KIM-1 expressing cells (efferocytosis) when they demonstrated a direct contact between  
497 cell-associated KIM-1 and apoptotic cells using a confocal microscopy approach (1). Consistent with this  
498 distinct cellular distribution of KIM-1 after kidney injury, we found that kidneys of *Muc1* KO mice have more  
499 than a two-fold significant increase in active NF- $\kappa$ B levels (nuclear expression) than WT mice following IRI.  
500 Previous work showed a similar result in which greater inflammatory response and kidney dysfunction  
501 were reported in mice expressing KIM-1 <sup>$\Delta$ mucin</sup> (KIM-1 protein missing the mucin domain required for  
502 apoptotic cells binding) compared to congenic shams following ischemic AKI (2). Altogether, these findings  
503 suggested that stabilizing cell-associated KIM-1 by MUC1 induction during IRI could protect the kidney by  
504 maintaining KIM-1-mediated efferocytosis and thus downregulating innate immunity and inflammation (Fig.  
505 9).

506

## 507 **PERSPECTIVES AND SIGNIFICANCE**

508 KIM-1 that is rapidly induced in the proximal tubule during renal IRI plays a key role in the recovery of the  
509 tubule epithelium by serving as a cell surface receptor for clearance of apoptotic cells (efferocytosis) and  
510 associated signaling that suppresses inflammation. While ADAM17 cleavage of KIM-1 yields a urinary  
511 biomarker, excessive cleavage provides a decoy receptor that aggravates efferocytosis and subsequent  
512 signaling. MUC1 is also induced during IRI and cleaved by ADAM17. Our data from studies in mice and  
513 cultured cells show that MUC1 competes with KIM-1 for cleavage by ADAM17. Consequently, MUC1  
514 protects KIM-1 anti-inflammatory activity in the damaged kidney.

515

## 516 **ACKNOWLEDGMENTS**

517 We thank Dr. Joseph Bonventre (Director, Renal Division, Brigham and Women's Hospital, Harvard  
518 Medical School, Boston, MA) and Dr. Craig Brooks (Department of Cell and Developmental Biology,  
519 Vanderbilt School of Medical, Nashville, TN) for providing a cDNA for mouse KIM-1. We thank Dr. Olivera  
520 Finn (Department of Immunology, University of Pittsburgh School of Medicine, Pittsburgh, PA) for providing  
521 kidneys from transgenic MUC1 mice, and the Center for Organ Recovery and Education (CORE) for  
522 provision of human material for research (Pittsburgh, PA).

523

524 This work was supported by National Institutes of Health Grants K01DK109038, HL109002, DK091190,  
525 HL069846, DK070910, DK038470, the Kidney Imaging Core of the Pittsburgh Center for Kidney Research  
526 (P30-DK079307), and Dialysis Clinic, Inc.,

527 **FIGURES LGENEDS**

528 **Figure 1. MUC1 protection of kidney function during IRI is associated with a role in the proximal**  
529 **tubule.** Kidneys of *Muc1* KO mice (red) and wild-type (WT) littermates (blue) were subjected to 20 min  
530 ischemia and 48 h recovery using the kidney hanging-weight protocol (IRI) or sham surgery (Sham). Prior  
531 to sacrifice, mice were assessed for (A) glomerular filtration rate (GFR). Blood and urine were collected at  
532 sacrifice and assayed for (B) serum creatinine, (C) urinary KIM-1 excretion rate, and (D) urinary NGAL  
533 excretion rate. Mean  $\pm$  SE are shown. Significant differences by two-way ANOVA are noted (\*:  $p < 0.05$ ; \*\*\*:  
534  $p < 0.001$ ,  $n = 5-7$ ).

535  
536 **Figure 2. KIM-1 and MUC1 are induced and co-expressed in the proximal tubule in the setting of**  
537 **ischemia.** Kidneys of *Muc1* KO mice and wild-type (WT) littermates were subjected to 20 min ischemia  
538 and 48 h recovery (IRI) or sham surgery (Sham). Kidneys were harvested at sacrifice and stained for (A)  
539 KIM-1 (green), and MUC1 (CT2, red) and nuclei (TOPRO, blue), or (B) KIM-1 (green), and ADAM17 (red)  
540 and nuclei (TOPRO, blue), as indicated. (C) Human kidneys with ischemic damage were stained for KIM-  
541 1 (green), MUC1 (B27.29, red) and nuclei (TOPRO, blue) as indicated. MUC1 staining was also observed  
542 in tubules not expressing KIM-1, consistent with MUC1 expression in TAL, DCT and CD. Scale bar = 10  
543  $\mu\text{m}$  ( $n = 3$  mice).

544  
545 **Figure 3. Kidney KIM-1 expression is significantly lower in *Muc1* KO mice than WT mice after IRI.**  
546 Kidneys of *Muc1* KO mice (red) and wild-type (WT) littermates (blue) were subjected to 20 min ischemia  
547 and 48 h recovery (IRI) or sham surgery (Sham). Kidneys were harvested at sacrifice and extracts of  
548 homogenates were subjected to immunoblotting for (A) KIM-1 and  $\beta$ -actin or (B) MUC1 small subunit (using  
549 CT2) and  $\beta$ -actin. Levels of KIM-1 or MUC1 were normalized to  $\beta$ -actin, and values for WT-IRI mice were  
550 set at 1. Data are presented as mean  $\pm$  SE. Significant differences by Student *t*-test are noted (\*;  $p < 0.05$ ,  
551  $n = 5$ ). (C) Levels of KIM-1 mRNA were assessed by RT-qPCR and relative levels presented with WT sham  
552 set at 1. Data were analyzed by two-way ANOVA and significant differences are noted (\*\*\*:  $p < 0.001$ ; \*\*\*\*:  
553  $p < 0.0001$ ,  $n = 5-7$ ).

554  
555 **Figure 4. MUC1, ADAM17, and KIM-1 are in the same complex in the kidney in the setting of**  
556 **ischemia.** (A) Kidneys of wild-type (WT) mice were subjected to 20 min ischemia and 48 h recovery.  
557 Kidneys were harvested at sacrifice and stained for MUC1 small subunit (CT2, green), ADAM17 (red) and  
558 nuclei (TOPRO, blue) as indicated. (B) Human kidneys with ischemic damage incubated with no primary  
559 antibodies (left) or with antibodies against MUC1 extracellular tandem repeats (B27.29, green), ADAM17  
560 (red) and nuclei (TOPRO, blue) as indicated. (C) *In situ* PLA (proximity ligation assay) was carried out  
561 using proximity probes against MUC1 (mouse B27.29) and ADAM17 (rabbit pAb) to visualize  
562 MUC1/ADAM17 complex in human kidney sections. Notice that the PLA signal is absent in the negative

563 control lacking the anti-MUC1 antibody, and absent in the glomerulus (GM) that lacks MUC1 expression  
564 despite high levels of ADAM17 expression. (D) Human kidneys with ischemic damage were co-stained for  
565 KIM-1 (green), ADAM17 (red), MUC1 extracellular tandem repeats (B27.29, gray), and nuclei (TOPRO,  
566 blue) as indicated. Scale bar = 10  $\mu$ m (n=3 mice).

567

568 **Figure 5. KIM-1 shedding is reduced by MUC1 expression in a cell culture model.** MDCK cells stably  
569 transfected with mouse KIM-1 were transiently transfected with human MUC1 cDNA or Empty Vector (EV).  
570 The next day, cells were incubated for 2 h in serum free media with either (i) 1.6 mM phorbol-12-myristate-  
571 13-acetate (PMA) to induce ADAM17 metalloprotease-mediated shedding of KIM-1 and MUC1, (ii) 10 mM  
572 BB-94 (a broad-spectrum matrix metalloprotease inhibitor), (iii) both PMA and BB-94, or (iv) vehicle  
573 (DMSO). (A) Cell extract (2.5%) or (B) immunoprecipitates of KIM-1 or MUC1 from media were  
574 immunoblotted for KIM-1 or MUC1 large subunit (B27.29). (C) Levels of KIM-1 in the medium are presented  
575 as percent of levels in the same cells transfected with MUC1 (blue) or empty vector (red). Data were  
576 analyzed by two-way ANOVA and significant differences are noted (\*:  $p < 0.05$ ; \*\*:  $p < 0.01$ , n=7-12).

577

578 **Figure 6. Cell-associated KIM-1 is reduced after IRI in the absence of MUC1.** Kidneys of *Muc1* KO  
579 mice and wild-type (WT) littermates were subjected to 20 min ischemia and 48 h recovery (IRI). Kidneys  
580 (n=4) were harvested at sacrifice and stained for KIM-1 (green) and nuclei (TOPRO, blue). Note that KIM-  
581 1 in WT kidneys (A) is primarily cell associated or surrounds luminal cell debris (see insert), while KIM-1  
582 staining in *Muc1* KO kidneys (B) is more diffuse and found primarily with cell debris (see insert) (n=4).

583

584 **Figure 7. Decreased efferocytosis in primary cultured proximal tubule cells from *Muc1* KO**  
585 **compared to WT littermates.** Primary cultures of mouse kidney proximal tubule cells (PTCs) obtained  
586 from *Muc1* KO (red) and WT littermates (blue) were grown on glass coverslips (A, B, F and G) or 12-well  
587 plates (C-E) and then incubated with CFSE fluorescently-labeled (green) apoptotic thymocytes. (A) Co-  
588 cultured PT monolayers with FITC-thymocytes (green) on coverslips were co-stained for actin (phalloidin,  
589 gray) and nuclei (TOPRO, blue). Scale bar = 10  $\mu$ m. (B) Total number of internalized apoptotic cells per  
590 total number of epithelial cells were scored by blinded microscopic counting of random fields. (C) Co-  
591 cultured PTC monolayers with FITC-thymocytes on 12-well plates were washed, solubilized and  
592 fluorescence of the lysates was quantitatively assessed by plate reader. (D) PTC lysates were subjected  
593 to immunoblotting for KIM-1 and  $\beta$ -actin, levels of KIM-1 were normalized to  $\beta$ -actin, and values for WT  
594 mice were set at 1. (E) Data from (D) are presented as mean  $\pm$  SE. Significant differences by Student *t*-  
595 test are noted (\*;  $p < 0.05$ , n=4). (F) Co-cultured PC monolayers with FITC-thymocytes (green) were co-  
596 stained for KIM-1 (red), phalloidin (gray), and nuclei (TOPRO, blue). (G) Confocal reconstruction (x-z) of  
597 KIM-1 and FITC-thymocytes demonstrates KIM-1 localization at the phagocytic cup and surrounding  
598 phagocytosed apoptotic cells within PTCs. Scale bar = 10  $\mu$ m (n=4).

599 **Figure 8. MUC1 stabilization of cell-associated KIM-1 correlates with reduced inflammation**  
600 **following IRI.** Kidneys of *Muc1* KO mice (red) and wild-type (WT) littermates (blue) were subjected to 20  
601 min ischemia and 48 h recovery (IRI) or sham surgery (Sham). (A) Kidneys were harvested at sacrifice  
602 and extracts of homogenates were subjected to immunoblotting for Toll-Like Receptor 4 (TLR4) and  $\beta$ -  
603 actin. (B-C) Aliquots of either nuclear extracts (Nuc) or cytoplasmic postnuclear supernatants (Cyto) of  
604 mouse kidneys were subjected to immunoblotting for NF- $\kappa$ B, and histone H3 or  $\beta$ -actin, respectively. TLR4  
605 and NF- $\kappa$ B levels were normalized to  $\beta$ -actin or Histone H3 as indicated, and levels for WT-Sham were set  
606 to 1. Data were analyzed by two-way ANOVA (\*:  $p < 0.05$ ; \*\*:  $p < 0.01$ ;  $n = 5-6$ ).

607

608 **Figure 9. KIM-1 activity is preserved in the injured kidney by MUC1 inhibition of KIM-1 shedding.**  
609 (LEFT) MUC1 induction in the PT following kidney injury reduces KIM-1 shedding by competing for  
610 ADAM17. (RIGHT) In the absence of MUC1, KIM-1 cleavage is accelerated and shed into the lumen where  
611 it acts as a decoy receptor, and subsequently inhibits efferocytosis. We hypothesize that stabilization of  
612 cell-associated KIM-1 by MUC1 induction during IRI could protect the kidney by maintaining KIM-1-  
613 mediated cell signaling and efferocytosis that reduces inflammation and promotes recovery.

614

615

616

617 **REFERENCES**

- 618 1. **Ichimura T, Asseldonk EJ, Humphreys BD, Gunaratnam L, Duffield JS, and Bonventre JV.**  
619 Kidney injury molecule-1 is a phosphatidylserine receptor that confers a phagocytic phenotype on epithelial  
620 cells. *J Clin Invest* 118: 1657-1668, 2008.
- 621 2. **Yang L, Brooks CR, Xiao S, Sabbisetti V, Yeung MY, Hsiao LL, Ichimura T, Kuchroo V, and**  
622 **Bonventre JV.** KIM-1-mediated phagocytosis reduces acute injury to the kidney. *J Clin Invest* 125: 1620-  
623 1636, 2015.
- 624 3. **Ichimura T, Hung CC, Yang SA, Stevens JL, and Bonventre JV.** Kidney injury molecule-1: a  
625 tissue and urinary biomarker for nephrotoxicant-induced renal injury. *Am J Physiol Renal Physiol* 286:  
626 F552-563, 2004.
- 627 4. **Humphreys BD, Xu F, Sabbisetti V, Grgic I, Movahedi Naini S, Wang N, Chen G, Xiao S, Patel**  
628 **D, Henderson JM, Ichimura T, Mou S, Soeung S, McMahon AP, Kuchroo VK, and Bonventre JV.**  
629 Chronic epithelial kidney injury molecule-1 expression causes murine kidney fibrosis. *J Clin Invest* 123:  
630 4023-4035, 2013.
- 631 5. **Han WK, Alinani A, Wu CL, Michaelson D, Loda M, McGovern FJ, Thadhani R, and Bonventre**  
632 **JV.** Human kidney injury molecule-1 is a tissue and urinary tumor marker of renal cell carcinoma. *J Am*  
633 *Soc Nephrol* 16: 1126-1134, 2005.
- 634 6. **Kuehn EW, Park KM, Somlo S, and Bonventre JV.** Kidney injury molecule-1 expression in murine  
635 polycystic kidney disease. *Am J Physiol Renal Physiol* 283: F1326-1336, 2002.
- 636 7. **Collier JB, and Schnellmann RG.** Extracellular Signal-Regulated Kinase 1/2 Regulates Mouse  
637 Kidney Injury Molecule-1 Expression Physiologically and Following Ischemic and Septic Renal Injury. *J*  
638 *Pharmacol Exp Ther* 363: 419-427, 2017.
- 639 8. **Ajay AK, Kim TM, Ramirez-Gonzalez V, Park PJ, Frank DA, and Vaidya VS.** A bioinformatics  
640 approach identifies signal transducer and activator of transcription-3 and checkpoint kinase 1 as upstream  
641 regulators of kidney injury molecule-1 after kidney injury. *J Am Soc Nephrol* 25: 105-118, 2014.
- 642 9. **Han WK, Waikar SS, Johnson A, Betensky RA, Dent CL, Devarajan P, and Bonventre JV.**  
643 Urinary biomarkers in the early diagnosis of acute kidney injury. *Kidney international* 73: 863-869, 2008.
- 644 10. **Gandhi R, Yi J, Ha J, Shi H, Ismail O, Nathoo S, Bonventre JV, Zhang X, and Gunaratnam L.**  
645 Accelerated receptor shedding inhibits kidney injury molecule-1 (KIM-1)-mediated efferocytosis. *Am J*  
646 *Physiol Renal Physiol* 307: F205-221, 2014.
- 647 11. **Zhang Z, Humphreys BD, and Bonventre JV.** Shedding of the urinary biomarker kidney injury  
648 molecule-1 (KIM-1) is regulated by MAP kinases and juxtamembrane region. *J Am Soc Nephrol* 18: 2704-  
649 2714, 2007.
- 650 12. **Schweigert O, Dewitz C, Moller-Hackbarth K, Trad A, Garbers C, Rose-John S, and Scheller**  
651 **J.** Soluble T cell immunoglobulin and mucin domain (TIM)-1 and -4 generated by A Disintegrin And  
652 Metalloprotease (ADAM)-10 and -17 bind to phosphatidylserine. *Biochim Biophys Acta* 1843: 275-287,  
653 2014.
- 654 13. **Sriranganathan S, Tutunea-Fatan E, Abbasi A, and Gunaratnam L.** Mapping and functional  
655 characterization of murine kidney injury molecule-1 proteolytic cleavage site. *Mol Cell Biochem* 476: 1093-  
656 1108, 2021.
- 657 14. **Thathiah A, Blobel CP, and Carson DD.** Tumor necrosis factor-alpha converting enzyme/ADAM  
658 17 mediates MUC1 shedding. *The Journal of biological chemistry* 278: 3386-3394, 2003.
- 659 15. **Kefaloyianni E, Muthu ML, Kaeppler J, Sun X, Sabbisetti V, Chalaris A, Rose-John S, Wong**  
660 **E, Sagi I, Waikar SS, Rennke H, Humphreys BD, Bonventre JV, and Herrlich A.** ADAM17 substrate  
661 release in proximal tubule drives kidney fibrosis. *JCI Insight* 1: 2016.
- 662 16. **Mulder GM, Melenhorst WB, Celie JW, Kloosterhuis NJ, Hillebrands JL, Ploeg RJ, Seelen**  
663 **MA, Visser L, van Dijk MC, and van Goor H.** ADAM17 up-regulation in renal transplant dysfunction and  
664 non-transplant-related renal fibrosis. *Nephrol Dial Transplant* 27: 2114-2122, 2012.
- 665 17. **Al-Bataineh MM, Sutton TA, and Hughey RP.** Novel roles for mucin 1 in the kidney. *Curr Opin*  
666 *Nephrol Hypertens* 26: 384-391, 2017.
- 667 18. **Pastor-Soler NM, Sutton TA, Mang HE, Kinlough CL, Gendler SJ, Madsen CS, Bastacky SI,**  
668 **Ho J, Al-Bataineh MM, Hallows KR, Singh S, Monga SP, Kobayashi H, Haase VH, and Hughey RP.**



- 669 Muc1 is protective during kidney ischemia-reperfusion injury. *Am J Physiol Renal Physiol* 308: F1452-  
670 1462, 2015.
- 671 19. **Al-Bataineh MM, Kinlough CL, Poland PA, Pastor-Soler NM, Sutton TA, Mang HE, Bastacky**  
672 **SI, Gendler SJ, Madsen CS, Singh S, Monga SP, and Hughey RP.** Muc1 enhances the beta-catenin  
673 protective pathway during ischemia-reperfusion injury. *Am J Physiol Renal Physiol* 310: F569-579, 2016.
- 674 20. **Thathiah A, and Carson DD.** MT1-MMP mediates MUC1 shedding independent of  
675 TACE/ADAM17. *Biochem J* 382: 363-373, 2004.
- 676 21. **Emllet DR, Pastor-Soler N, Marciszyn A, Wen X, Gomez H, Humphries WH, Morrisroe S,**  
677 **Volpe JK, and Kellum JA.** Insulin-like growth factor binding protein 7 and tissue inhibitor of  
678 metalloproteinases-2: differential expression and secretion in human kidney tubule cells. *Am J Physiol*  
679 *Renal Physiol* 312: F284-F296, 2017.
- 680 22. **Sheridan AM, Schwartz JH, Kroshian VM, Tercyak AM, Laraia J, Masino S, and Lieberthal W.**  
681 Renal mouse proximal tubular cells are more susceptible than MDCK cells to chemical anoxia. *Am J*  
682 *Physiol* 265: F342-350, 1993.
- 683 23. **Kardon R, Price RE, Julian J, Lagow E, Tseng SC, Gendler SJ, and Carson DD.** Bacterial  
684 conjunctivitis in Muc1 null mice. *Investigative ophthalmology & visual science* 40: 1328-1335, 1999.
- 685 24. **DeSouza MM, Surveyor GA, Price RE, Julian J, Kardon R, Zhou X, Gendler S, Hilkens J, and**  
686 **Carson DD.** MUC1/episialin: a critical barrier in the female reproductive tract. *Journal of reproductive*  
687 *immunology* 45: 127-158, 1999.
- 688 25. **Jackson EK, Menshikova EV, Mi Z, Verrier JD, Bansal R, Janesko-Feldman K, Jackson TC,**  
689 **and Kochanek PM.** Renal 2',3'-Cyclic Nucleotide 3'-Phosphodiesterase Is an Important Determinant of  
690 AKI Severity after Ischemia-Reperfusion. *J Am Soc Nephrol* 27: 2069-2081, 2016.
- 691 26. **Zinellu A, Caria MA, Tavera C, Sotgia S, Chessa R, Deiana L, and Carru C.** Plasma creatinine  
692 and creatine quantification by capillary electrophoresis diode array detector. *Anal Biochem* 342: 186-193,  
693 2005.
- 694 27. **Al-Bataineh MM, Alzamora R, Ohmi K, Ho PY, Marciszyn AL, Gong F, Li H, Hallows KR, and**  
695 **Pastor-Soler NM.** Aurora kinase A activates the vacuolar H<sup>+</sup>-ATPase (V-ATPase) in kidney carcinoma  
696 cells. *Am J Physiol Renal Physiol* 310: F1216-1228, 2016.
- 697 28. **Hundhausen C, Misztela D, Berkhout TA, Broadway N, Saftig P, Reiss K, Hartmann D,**  
698 **Fahrenholz F, Postina R, Matthews V, Kallen KJ, Rose-John S, and Ludwig A.** The disintegrin-like  
699 metalloproteinase ADAM10 is involved in constitutive cleavage of CX3CL1 (fractalkine) and regulates  
700 CX3CL1-mediated cell-cell adhesion. *Blood* 102: 1186-1195, 2003.
- 701 29. **Sriranganathan S, Tutunea-Fatan E, Abbasi A, and Gunaratnam L.** Mapping and functional  
702 characterization of murine kidney injury molecule-1 proteolytic cleavage site. *Mol Cell Biochem* 2020.
- 703 30. **Brooks CR, Yeung MY, Brooks YS, Chen H, Ichimura T, Henderson JM, and Bonventre JV.**  
704 KIM-1-/TIM-1-mediated phagocytosis links ATG5-/ULK1-dependent clearance of apoptotic cells to antigen  
705 presentation. *EMBO J* 34: 2441-2464, 2015.
- 706 31. **Al-Bataineh MM, Li H, Ohmi K, Gong F, Marciszyn AL, Naveed S, Zhu X, Neumann D, Wu Q,**  
707 **Cheng L, Fenton RA, Pastor-Soler NM, and Hallows KR.** Activation of the metabolic sensor AMP-  
708 activated protein kinase inhibits aquaporin-2 function in kidney principal cells. *Am J Physiol Renal Physiol*  
709 311: F890-F900, 2016.
- 710 32. **Soderberg O, Leuchowius KJ, Gullberg M, Jarvius M, Weibrecht I, Larsson LG, and**  
711 **Landegren U.** Characterizing proteins and their interactions in cells and tissues using the in situ proximity  
712 ligation assay. *Methods* 45: 227-232, 2008.
- 713 33. **Grenz A, Eckle T, Zhang H, Huang DY, Wehrmann M, Kohle C, Unertl K, Osswald H, and**  
714 **Eltzschig HK.** Use of a hanging-weight system for isolated renal artery occlusion during ischemic  
715 preconditioning in mice. *Am J Physiol Renal Physiol* 292: F475-485, 2007.
- 716 34. **Jackson EK, Menshikova EV, Mi Z, Verrier JD, Bansal R, Janesko-Feldman K, Jackson TC,**  
717 **and Kochanek PM.** Renal 2',3'-Cyclic Nucleotide 3'-Phosphodiesterase Is an Important Determinant of  
718 AKI Severity after Ischemia-Reperfusion. *J Am Soc Nephrol* 2015.
- 719 35. **Quinton LJ, Blahna MT, Jones MR, Allen E, Ferrari JD, Hilliard KL, Zhang X, Sabharwal V,**  
720 **Algul H, Akira S, Schmid RM, Pelton SI, Spira A, and Mizgerd JP.** Hepatocyte-specific mutation of both  
721 NF-kappaB RelA and STAT3 abrogates the acute phase response in mice. *J Clin Invest* 122: 1758-1763,  
722 2012.

- 723 36. **Blaydon DC, Biancheri P, Di WL, Plagnol V, Cabral RM, Brooke MA, van Heel DA,**  
724 **Ruschendorf F, Toynbee M, Walne A, O'Toole EA, Martin JE, Lindley K, Vulliamy T, Abrams DJ,**  
725 **MacDonald TT, Harper JI, and Kelsell DP.** Inflammatory skin and bowel disease linked to ADAM17  
726 deletion. *N Engl J Med* 365: 1502-1508, 2011.
- 727 37. **Peschon JJ, Slack JL, Reddy P, Stocking KL, Sunnarborg SW, Lee DC, Russell WE, Castner**  
728 **BJ, Johnson RS, Fitzner JN, Boyce RW, Nelson N, Kozlosky CJ, Wolfson MF, Rauch CT, Cerretti**  
729 **DP, Paxton RJ, March CJ, and Black RA.** An essential role for ectodomain shedding in mammalian  
730 development. *Science* 282: 1281-1284, 1998.
- 731 38. **Tang ZY, Loss G, Carmody I, and Cohen AJ.** TIMP-3 ameliorates hepatic ischemia/reperfusion  
732 injury through inhibition of tumor necrosis factor-alpha-converting enzyme activity in rats. *Transplantation*  
733 82: 1518-1523, 2006.
- 734

Figure 1. MUC1 protection of kidney function during IRI is associated with a role in the proximal tubule.

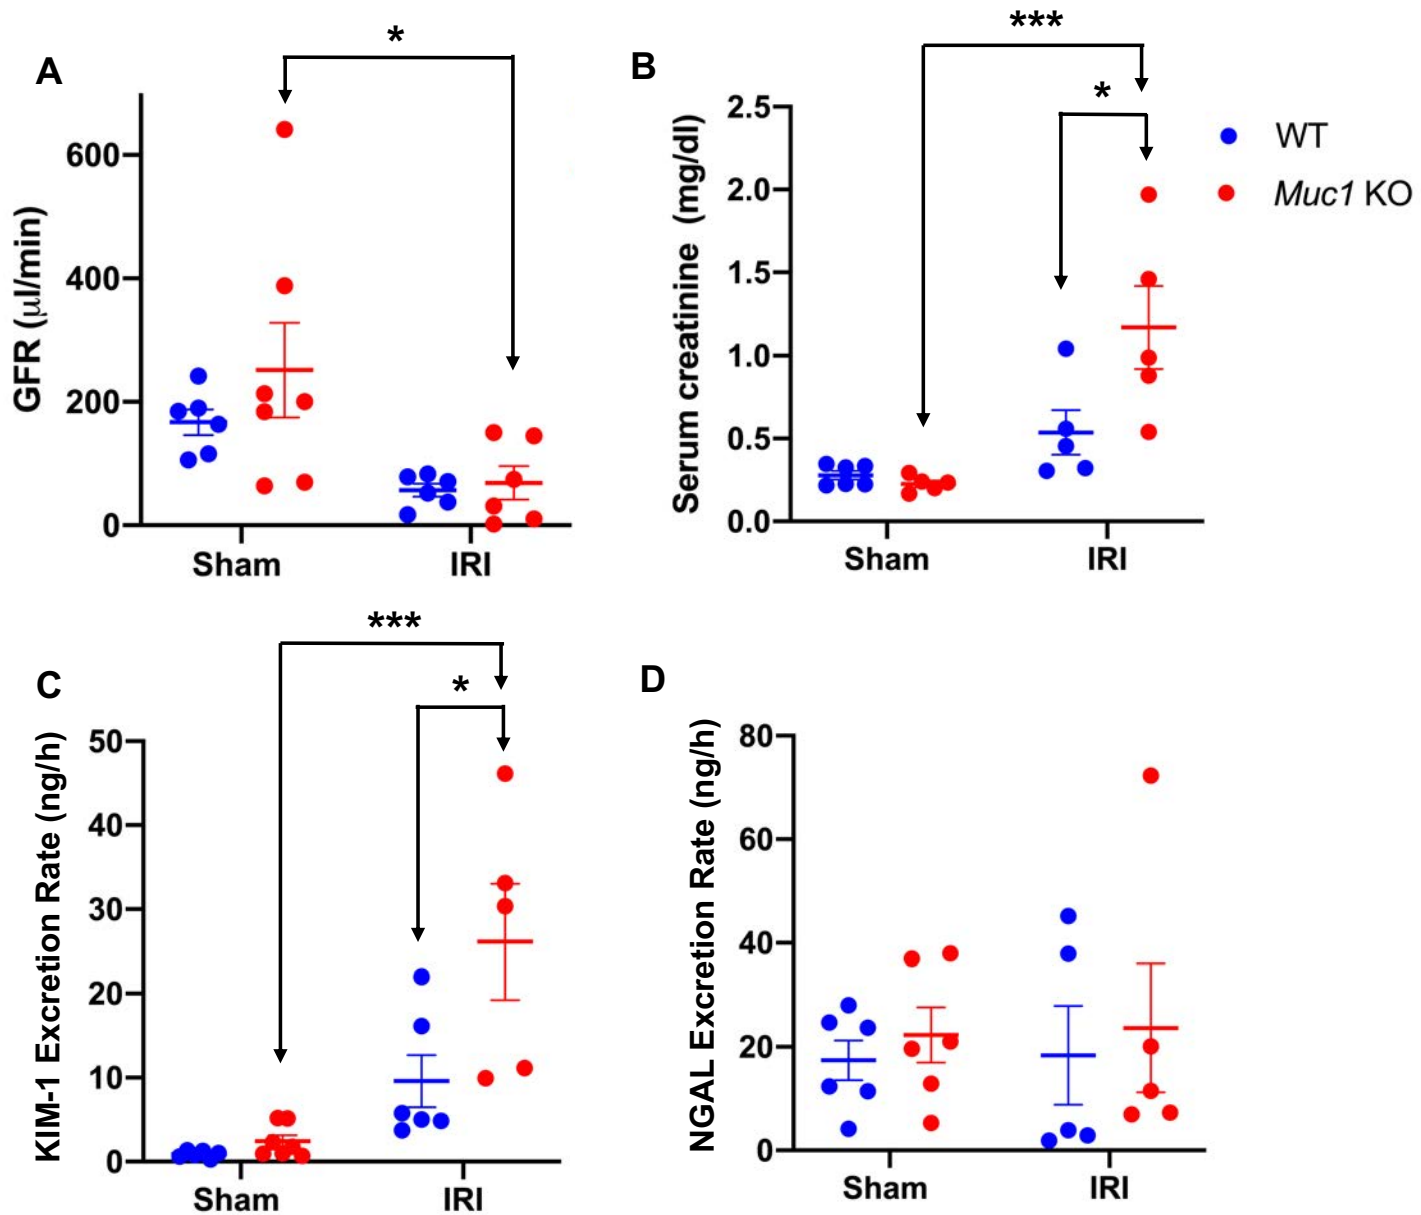

Figure 2. KIM-1 and MUC1 are induced and co-localized in the proximal tubule in the setting of ischemia.

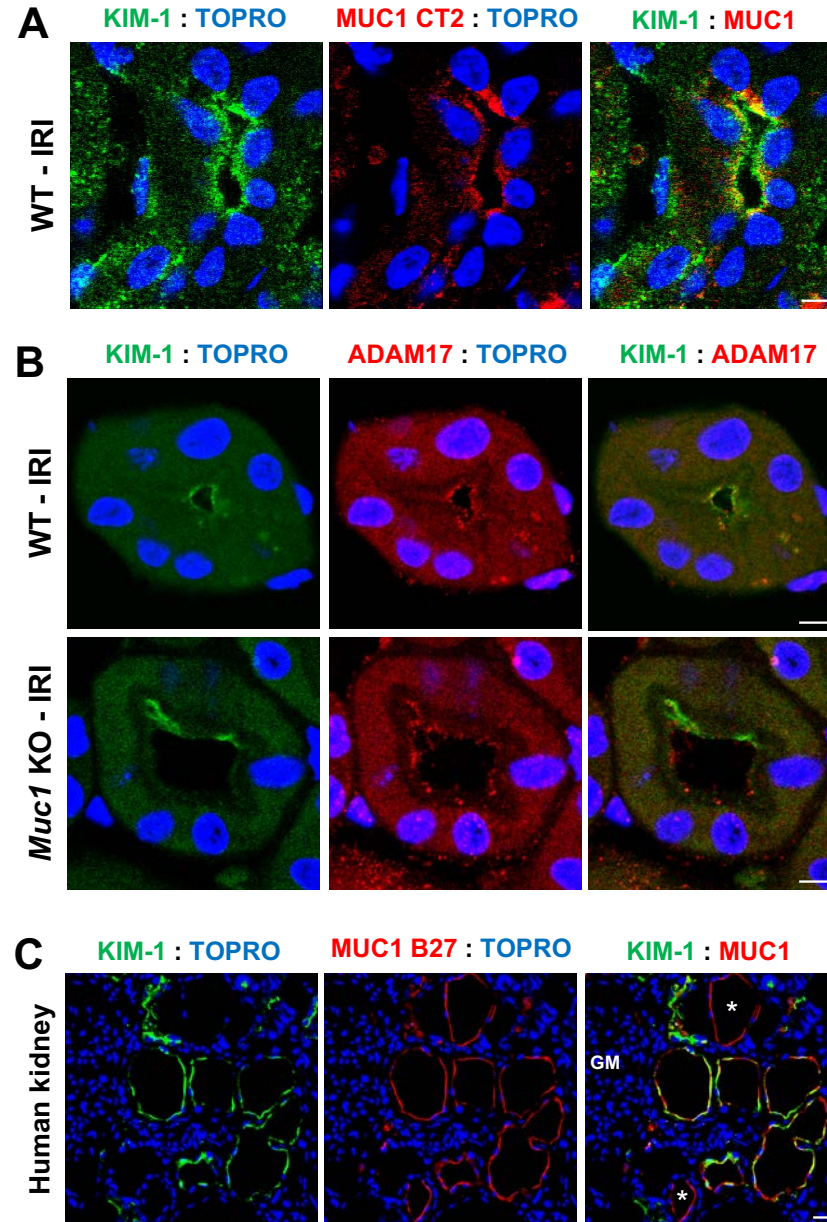

Figure 3. Kidney KIM-1 expression is significantly lower in *Muc1* KO mice than WT mice after IRI.

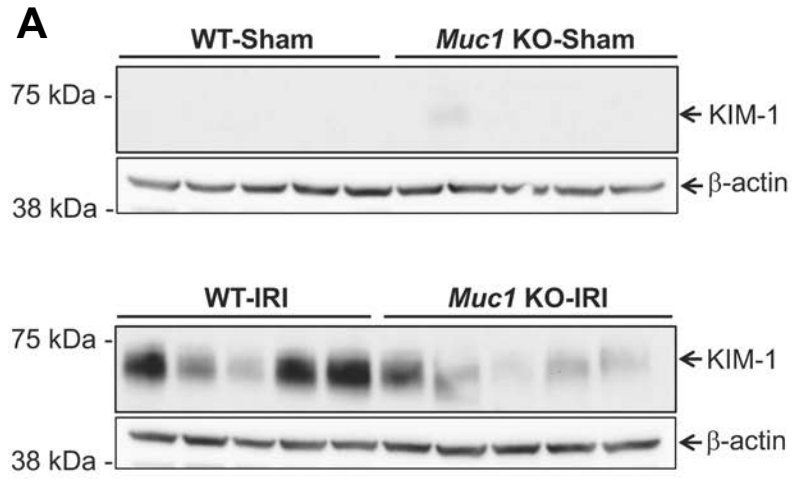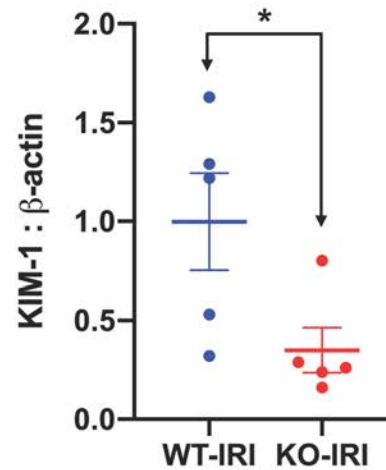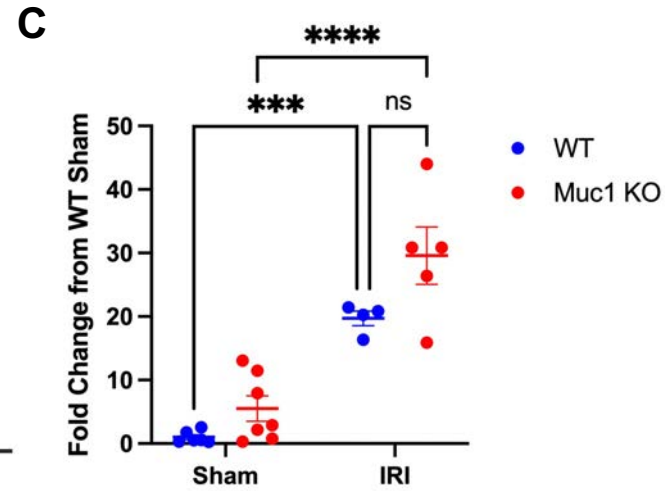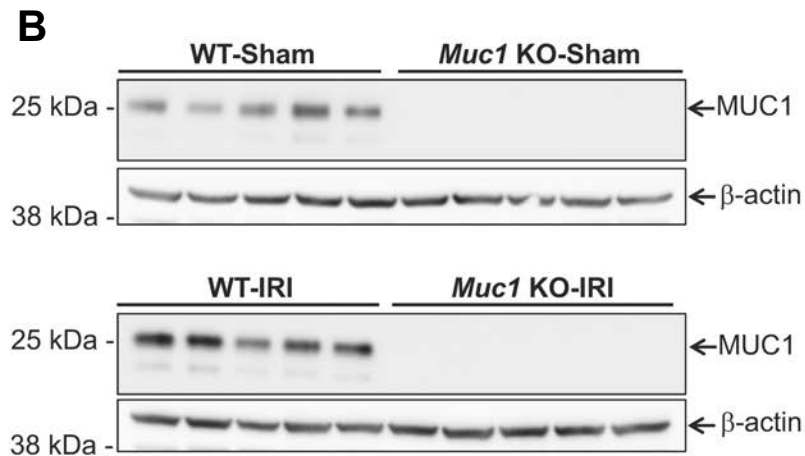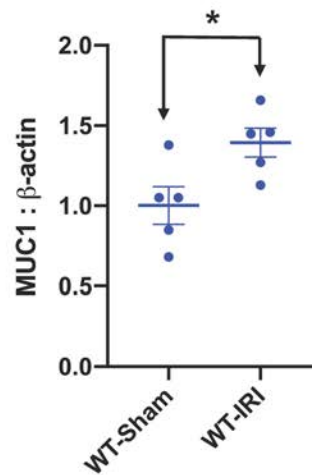

Figure 4. MUC1, ADAM17, and KIM-1 are in the same complex in kidney in the setting of ischemia.

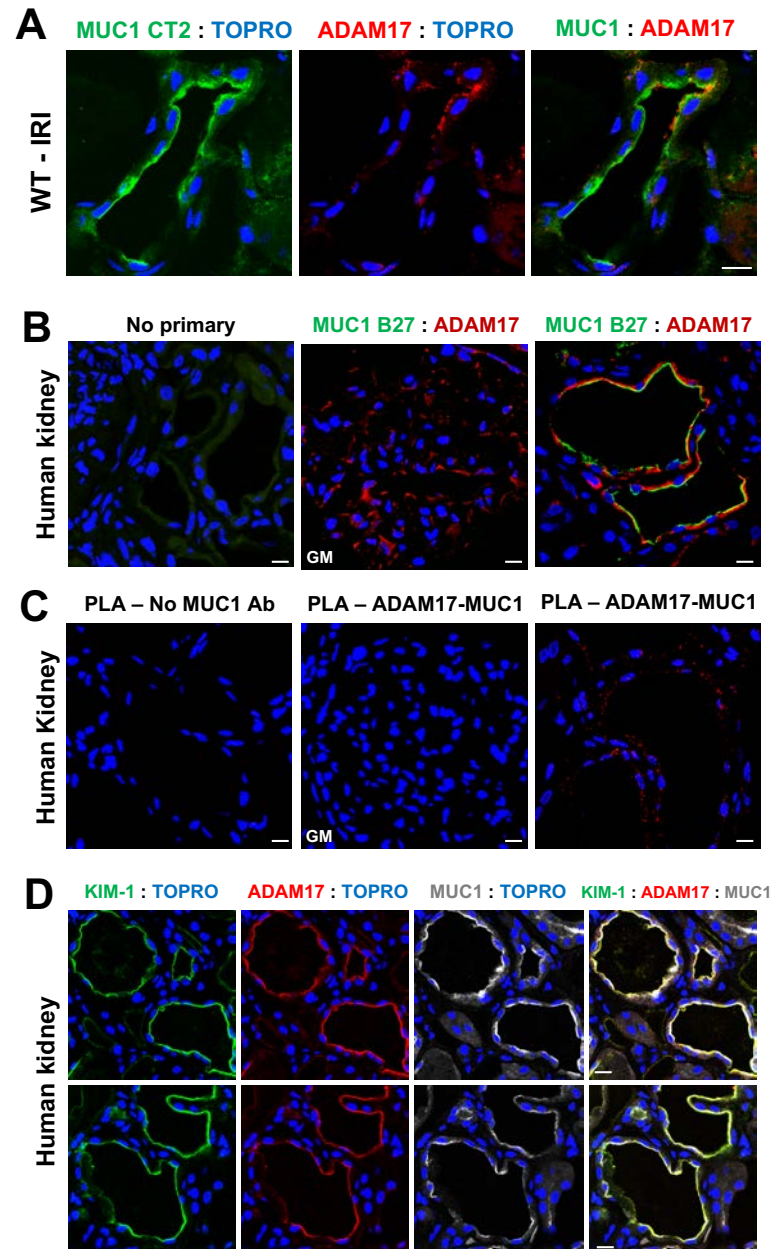

Figure 5. KIM-1 shedding is reduced by MUC1 expression in a cell culture model.

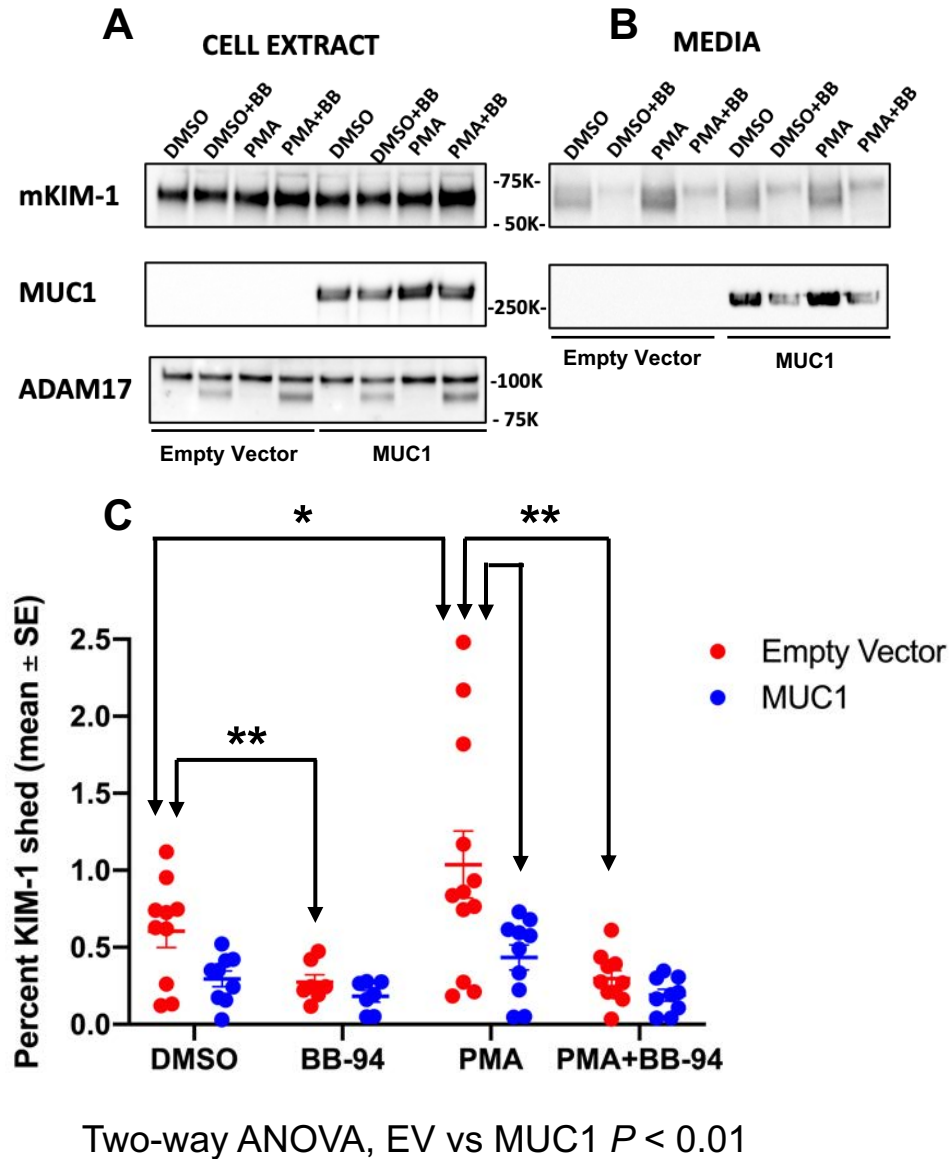

Figure 6. Cell-associated KIM-1 is reduced after IRI in the absence of MUC1.

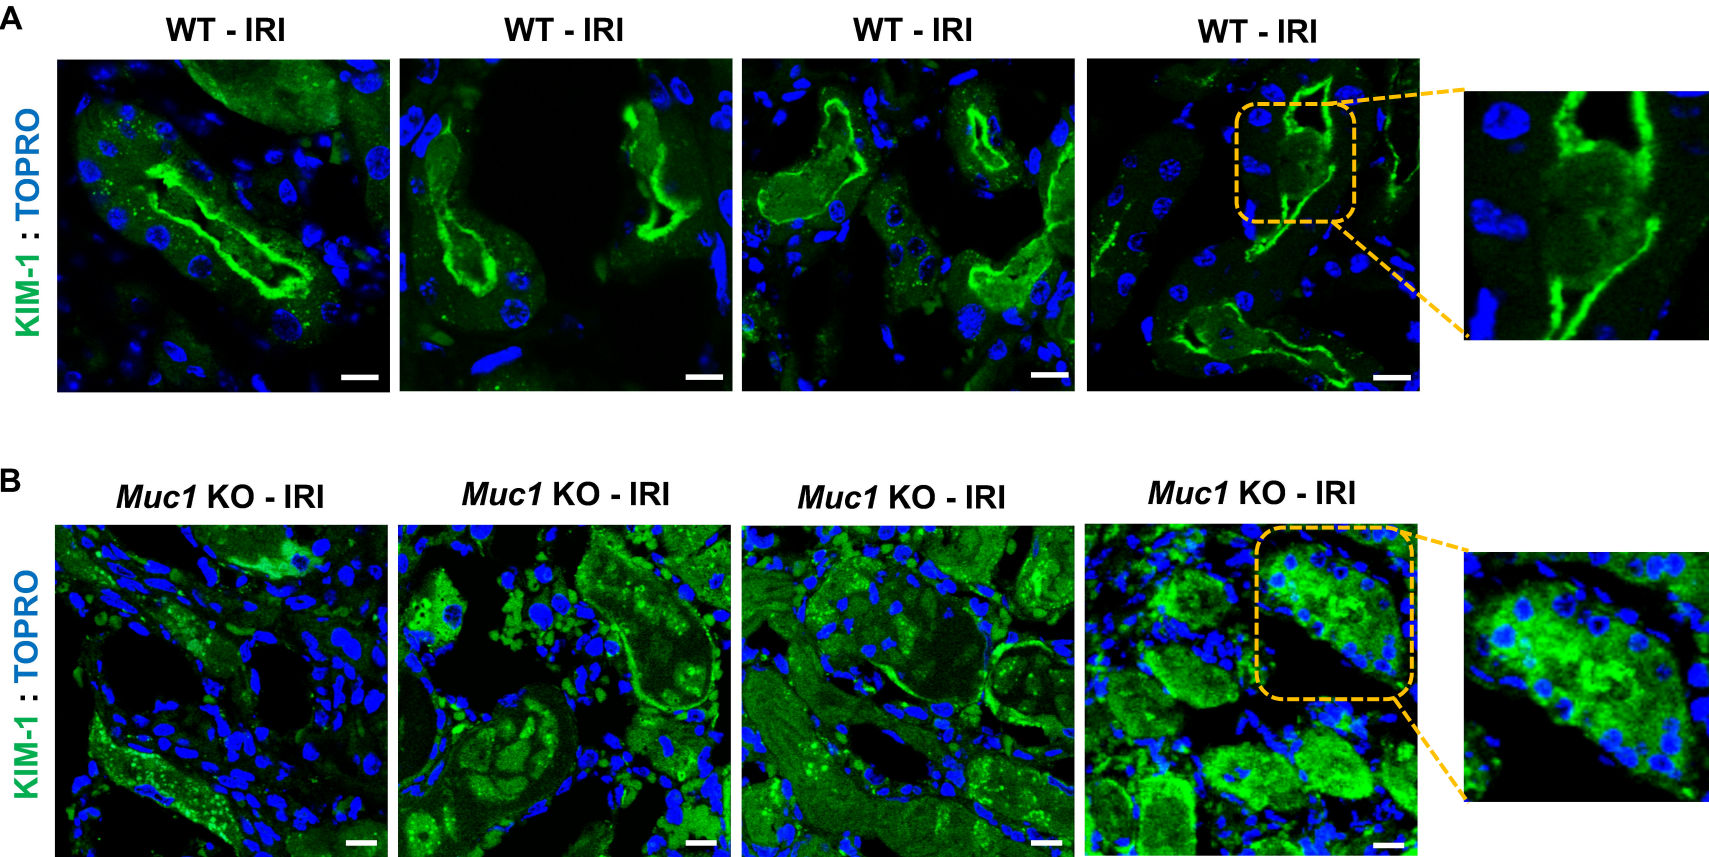



Figure 7. Decreased efferocytosis in primary cultured proximal tubule cells from *Muc1* KO compared to WT littermates

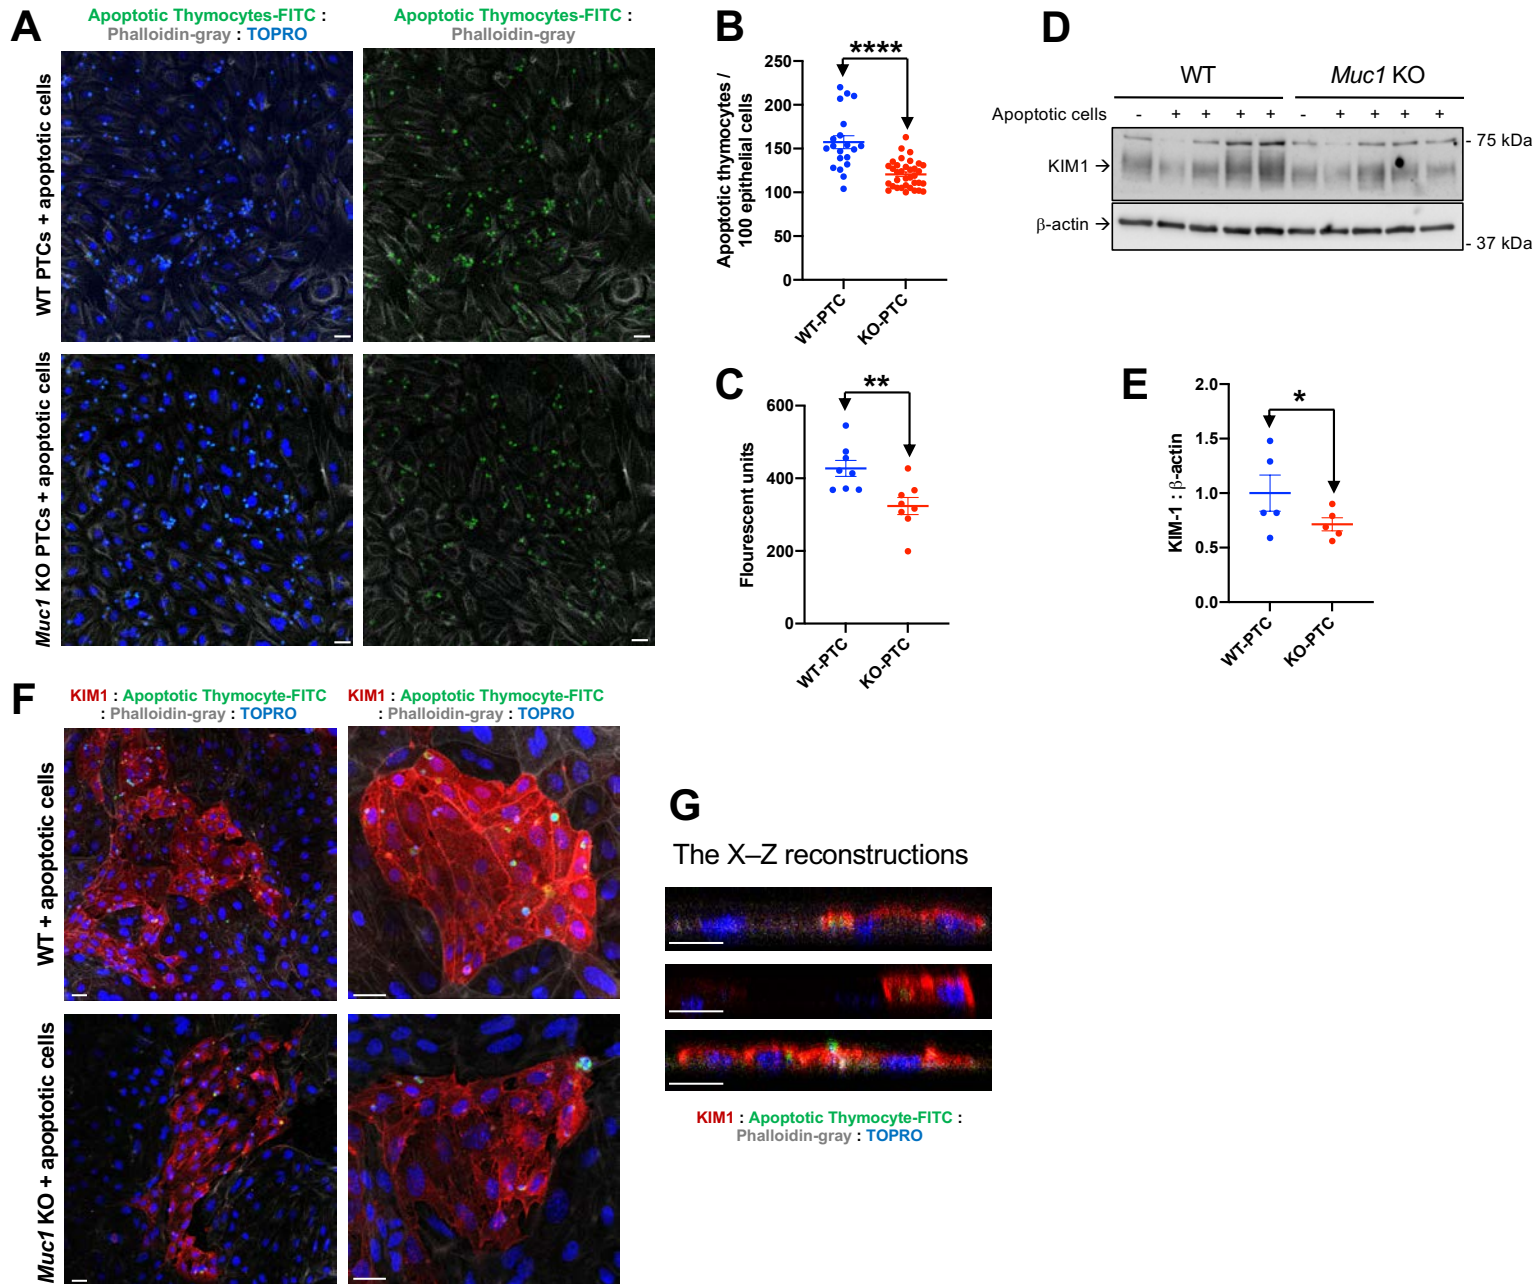

Figure 8. MUC1 stabilization of cell-associated KIM-1 correlates with reduced inflammation following IRI.

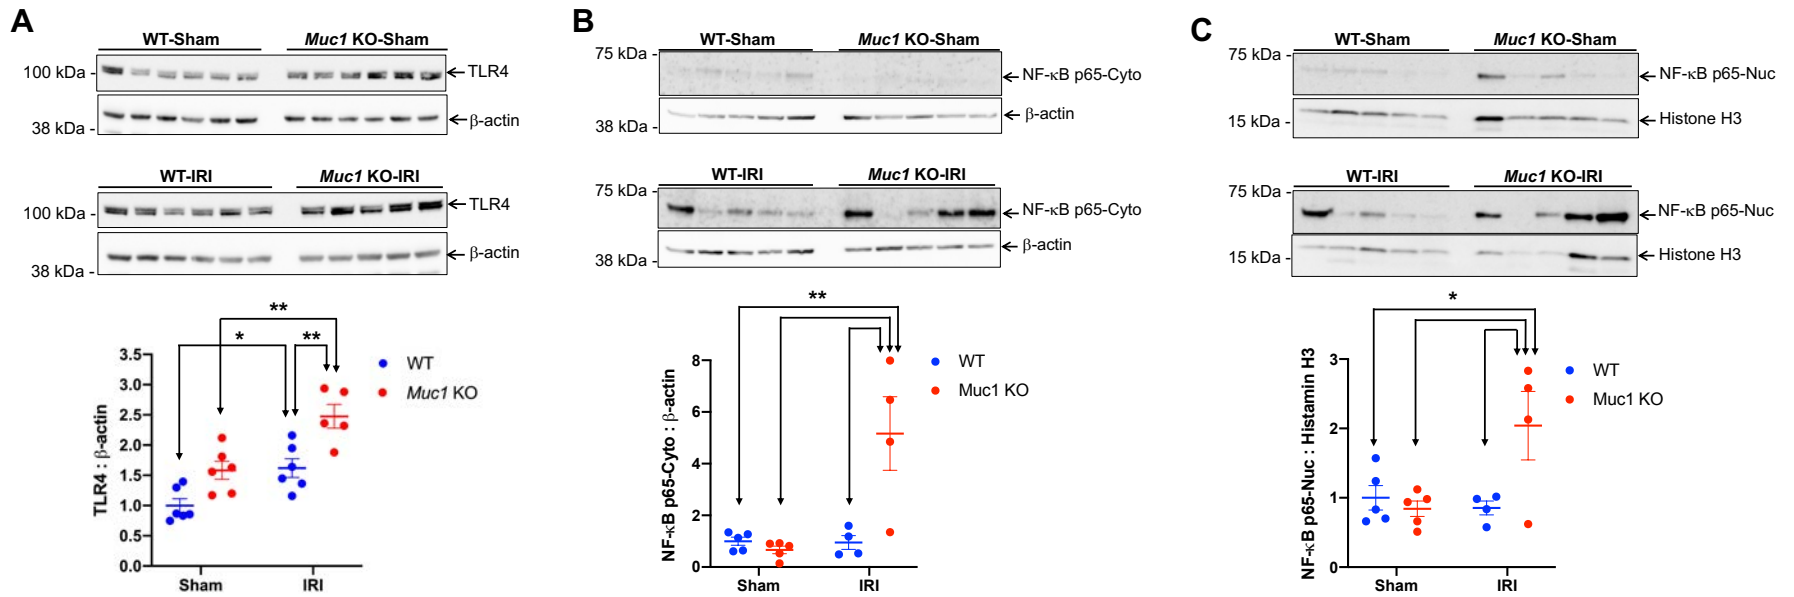

Figure 9. KIM-1 activity is preserved in the injured kidney by MUC1 inhibition of KIM-1 shedding.

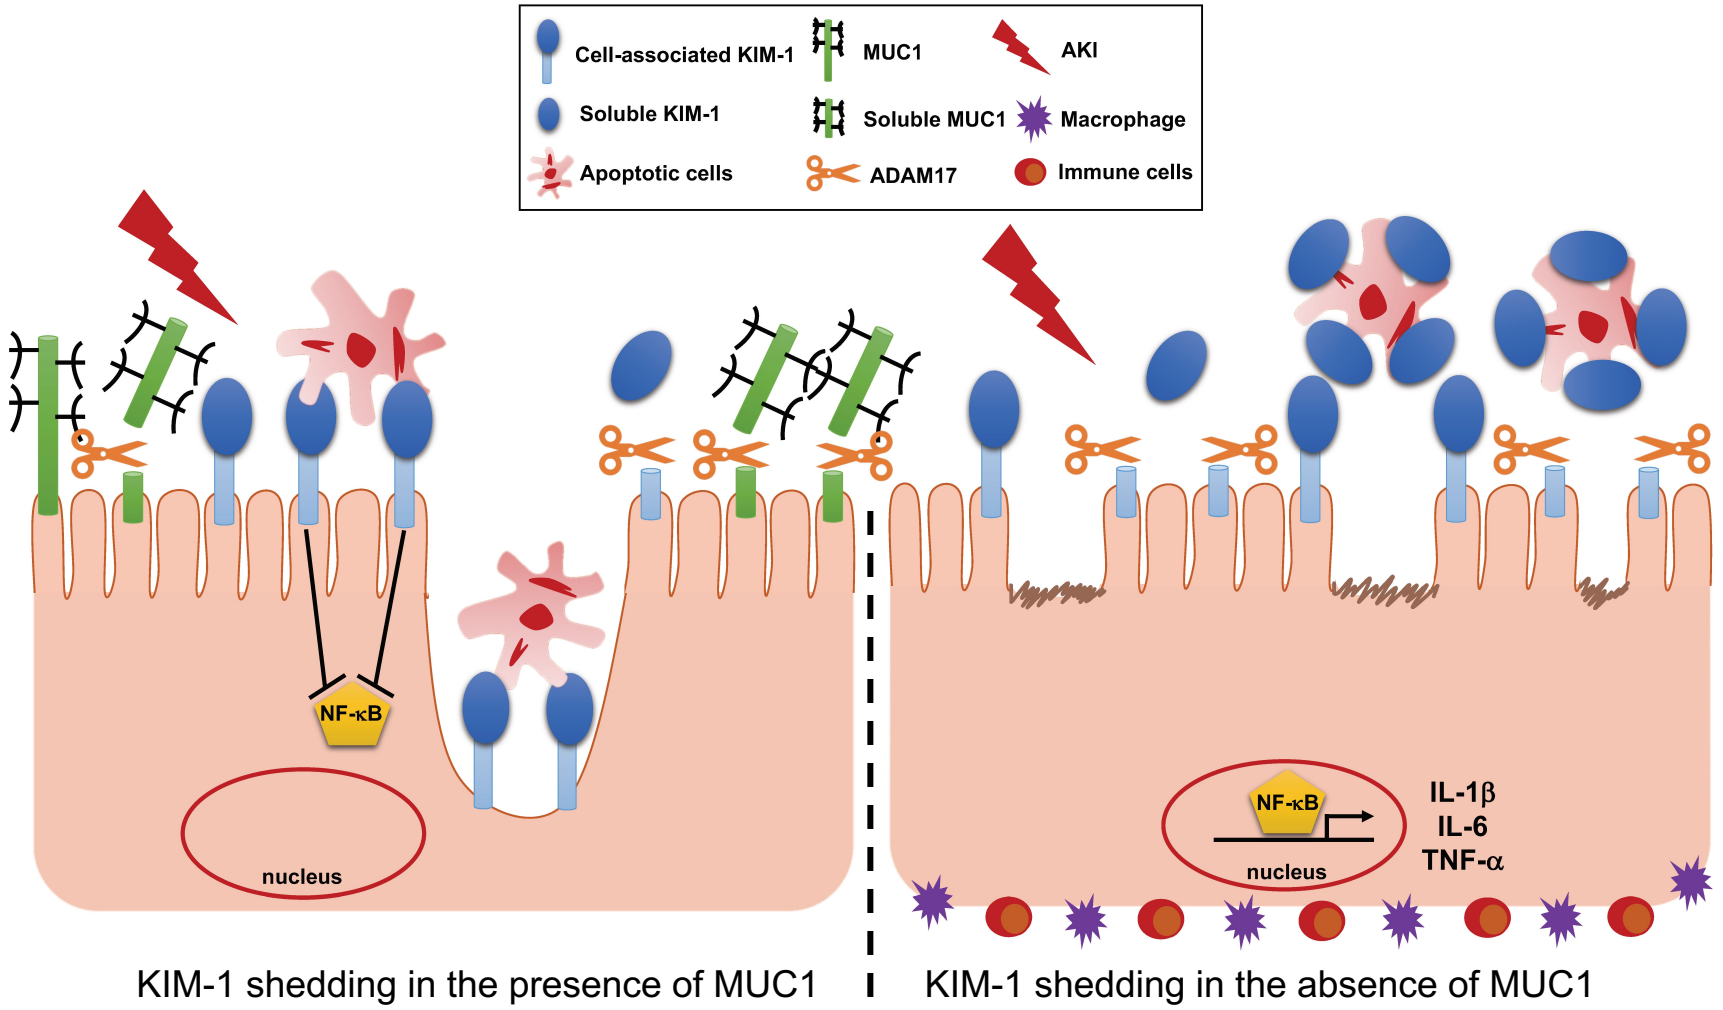

Source: https://www.biorxiv.org/content/10.1101/2021.05.20.445053v1.full.pdf
